# Supplementary material
Source: publisher figshare collection journal article supplement (https://acs.figshare.com/ndownloader/files/4667044)
Supplement: Supplementary file 1 [file 4667044]

 
data_brbridge 
 
_audit_creation_method            SHELXL-97 
_chemical_name_systematic 
; 
 ? 
; 
_chemical_name_common             ? 
_chemical_melting_point           ? 
_chemical_formula_moiety          
 'C20 H18 N4 Br4, C6 H6' 
_chemical_formula_sum 
 'C26 H24 Br4 N4' 
_chemical_formula_weight          712.13 
 
loop_ 
 _atom_type_symbol 
 _atom_type_description 
 _atom_type_scat_dispersion_real 
 _atom_type_scat_dispersion_imag 
 _atom_type_scat_source 
 'C'  'C'   0.0033   0.0016 
 'International Tables Vol C Tables 4.2.6.8 and 6.1.1.4' 
 'H'  'H'   0.0000   0.0000 
 'International Tables Vol C Tables 4.2.6.8 and 6.1.1.4' 
 'N'  'N'   0.0061   0.0033 
 'International Tables Vol C Tables 4.2.6.8 and 6.1.1.4' 
 'Br'  'Br'  -0.2901   2.4595 
 'International Tables Vol C Tables 4.2.6.8 and 6.1.1.4' 
 
_symmetry_cell_setting            Monoclinic 
_symmetry_space_group_name_H-M    C2/c
 
loop_ 
 _symmetry_equiv_pos_as_xyz 
 'x, y, z' 
 '-x, y, -z+1/2' 
 'x+1/2, y+1/2, z' 
 '-x+1/2, y+1/2, -z+1/2' 
 '-x, -y, -z' 
 'x, -y, z-1/2' 
 '-x+1/2, -y+1/2, -z' 
 'x+1/2, -y+1/2, z-1/2' 
 
_cell_length_a                    21.2572(4) 
_cell_length_b                    7.5300(2) 
_cell_length_c                    17.5917(5) 
_cell_angle_alpha                 90.00 
_cell_angle_beta                  114.053(2) 
_cell_angle_gamma                 90.00 
_cell_volume                      2571.34(11) 
_cell_formula_units_Z             4 
_cell_measurement_temperature     153(2) 
_cell_measurement_reflns_used     3086
_cell_measurement_theta_min       1 
_cell_measurement_theta_max       27.5 
 
_exptl_crystal_description        plates 
_exptl_crystal_colour             red-orange
_exptl_crystal_size_max           0.29 
_exptl_crystal_size_mid           0.25 
_exptl_crystal_size_min           0.09 
_exptl_crystal_density_meas       ? 
_exptl_crystal_density_diffrn     1.840 
_exptl_crystal_density_method     'not measured' 
_exptl_crystal_F_000              1392 
_exptl_absorpt_coefficient_mu     6.283 
_exptl_absorpt_correction_type    multi-scan 
_exptl_absorpt_correction_T_min   0.328 
_exptl_absorpt_correction_T_max   0.575 
_exptl_absorpt_process_details    
;
DENZO and Scalepack (Otwinoski and Minor, 1997)
; 
_exptl_special_details 
; 
 ? 
; 
 
_diffrn_ambient_temperature       153(2) 
_diffrn_radiation_wavelength      0.71073 
_diffrn_radiation_type            MoK\a 
_diffrn_radiation_source          'fine-focus sealed tube' 
_diffrn_radiation_monochromator   graphite 
_diffrn_measurement_device_type   'Nonius Kappa CCD' 
_diffrn_measurement_method        \w-scans 
_diffrn_detector_area_resol_mean  ? 
_diffrn_standards_number          ? 
_diffrn_standards_interval_count  ? 
_diffrn_standards_interval_time   ? 
_diffrn_standards_decay_%         ? 
_diffrn_reflns_number             5019 
_diffrn_reflns_av_R_equivalents   0.0281 
_diffrn_reflns_av_sigmaI/netI     0.0372 
_diffrn_reflns_limit_h_min        -27 
_diffrn_reflns_limit_h_max        27 
_diffrn_reflns_limit_k_min        -9 
_diffrn_reflns_limit_k_max        7 
_diffrn_reflns_limit_l_min        -22 
_diffrn_reflns_limit_l_max        22 
_diffrn_reflns_theta_min          2.54 
_diffrn_reflns_theta_max          27.49 
_reflns_number_total              2946 
_reflns_number_gt                 2260 
_reflns_threshold_expression      >2sigma(I) 
 
_publ_section_references
;
Altomare A., Burla M.C., Camalli M., Cascarano G.L., Giacovazzo C., 
Guagliardi A., Moliterni A.G.G., Polidori G.,Spagna R. Sir97.  
(1999) J. Appl. Cryst. 32, 115-119.

Otwinowski, Z. and Minor, W.  (1997).  Methods in Enzymology,
276, Macromolecular Crystallography, part A, 307-326, C. W. Carter,
Jr. and R. M. Sweets, Eds., Academic Press.

Sheldrick, G. M.  (1998).  SHELXTL/PC.  Release 5.10.  Siemens 
Analytical X-ray Instruments, Inc., Madison, WI, USA.


;
_computing_data_collection        'Collect software, Nonius B.V. 1998'
_computing_cell_refinement        'Collect software, Nonius B.V. 1998'
_computing_data_reduction         
;
DENZO and Scalepack (Otwinoski and Minor, 1997)
;
_computing_structure_solution     
;

SIR97 - Altomare A., Burla M.C., Camalli M., Cascarano G.L., Giacovazzo C., 
Guagliardi A., Moliterni A.G.G., Polidori G.,Spagna R.
;
_computing_structure_refinement   'XL SHELXTL/PC, Siemens Analytical'
_computing_molecular_graphics     'XP SHELXTL/PC, Siemens Analytical' 
_computing_publication_material   ? 


  
_refine_special_details 
; 
 Refinement of F^2^ against ALL reflections.  The weighted R-factor wR and 
 goodness of fit S are based on F^2^, conventional R-factors R are based 
 on F, with F set to zero for negative F^2^. The threshold expression of 
 F^2^ > 2sigma(F^2^) is used only for calculating R-factors(gt) etc. and is 
 not relevant to the choice of reflections for refinement.  R-factors based 
 on F^2^ are statistically about twice as large as those based on F, and R- 
 factors based on ALL data will be even larger. 
	The tetrabromine molecule resides on a crystallographic two-fold 
rotation axis at 1/2, y, 1/4.  As a result, the molecule is disordered by 
symmetry.
	There is a molecule of benzene that lies around a crystallographic 
inversion center at 3/4, 1/4, 0.  The benzene molecule is also disordered.  
The disorder was modeled by restraining the geometry of the two benzene 
molecules to be equivalent and by assigning the site occupancy factor of 
one molecule to the variable x and the site occupancy factor of the other 
molecule to be (1-x).  The isotropic displacement parameters for the carbon 
atoms were constrained to be equal.  In this way, the major component of the 
disordered benzene atoms had site occupancy factors of 56(2)% represented by 
C1a, C2a and C3a.  
; 
 
_refine_ls_structure_factor_coef  Fsqd  
_refine_ls_matrix_type            full 
_refine_ls_weighting_scheme       calc  
_refine_ls_weighting_details 
 'calc w=1/[\s^2^(Fo^2^)+(0.0527P)^2^+11.6226P] where P=(Fo^2^+2Fc^2^)/3' 
_atom_sites_solution_primary      direct 
_atom_sites_solution_secondary    difmap 
_atom_sites_solution_hydrogens    geom 
_refine_ls_hydrogen_treatment     constr 
_refine_ls_extinction_method      SHELXL 
_refine_ls_extinction_coef        0.0019(3) 
_refine_ls_extinction_expression 
 'Fc^*^=kFc[1+0.001xFc^2^\l^3^/sin(2\q)]^-1/4^' 
_refine_ls_number_reflns          2946 
_refine_ls_number_parameters      191 
_refine_ls_number_restraints      37 
_refine_ls_R_factor_all           0.0725 
_refine_ls_R_factor_gt            0.0543 
_refine_ls_wR_factor_ref          0.1431 
_refine_ls_wR_factor_gt           0.1320 
_refine_ls_goodness_of_fit_ref    1.124 
_refine_ls_restrained_S_all       1.122 
_refine_ls_shift/su_max           0.096 
_refine_ls_shift/su_mean          0.009 
 
loop_ 
 _atom_site_label 
 _atom_site_type_symbol 
 _atom_site_fract_x 
 _atom_site_fract_y 
 _atom_site_fract_z 
 _atom_site_U_iso_or_equiv 
 _atom_site_adp_type 
 _atom_site_occupancy 
 _atom_site_symmetry_multiplicity 
 _atom_site_calc_flag 
 _atom_site_refinement_flags 
 _atom_site_disorder_assembly 
 _atom_site_disorder_group 
Br1 Br 0.33539(3) 0.31310(9) -0.18604(4) 0.0681(3) Uani 1 1 d . . . 
Br2 Br 0.50363(4) 0.24945(10) -0.14712(4) 0.0707(3) Uani 1 1 d . . . 
N1 N 0.4248(3) 0.3013(6) 0.1442(3) 0.0572(11) Uani 1 1 d . . . 
N2 N 0.5379(3) 0.2553(6) 0.1700(3) 0.0614(12) Uani 1 1 d . . . 
C1 C 0.4920(4) 0.2784(7) 0.2089(3) 0.0634(15) Uani 1 1 d . . . 
C2 C 0.4317(3) 0.2933(6) 0.0684(3) 0.0503(12) Uani 1 1 d . . . 
C3 C 0.3823(3) 0.3105(7) -0.0107(3) 0.0499(11) Uani 1 1 d . . . 
H3 H 0.3355 0.3324 -0.0213 0.060 Uiso 1 1 calc R . . 
C4 C 0.4044(3) 0.2942(7) -0.0765(3) 0.0503(11) Uani 1 1 d . . . 
C5 C 0.4722(3) 0.2651(7) -0.0607(3) 0.0513(12) Uani 1 1 d . . . 
C6 C 0.5220(3) 0.2510(7) 0.0204(3) 0.0549(12) Uani 1 1 d . . . 
H6 H 0.5691 0.2328 0.0313 0.066 Uiso 1 1 calc R . . 
C7 C 0.5007(3) 0.2644(7) 0.0843(3) 0.0518(12) Uani 1 1 d . . . 
C8 C 0.3738(3) 0.4183(8) 0.1539(4) 0.0686(16) Uani 1 1 d . . . 
H8A H 0.3597 0.5069 0.1109 0.103 Uiso 1 1 d R . . 
H8B H 0.3938 0.4748 0.2074 0.103 Uiso 1 1 d R . . 
H8C H 0.3345 0.3498 0.1500 0.103 Uiso 0.50 1 d PR . . 
C9 C 0.5992(4) 0.1435(10) 0.2056(4) 0.097(3) Uani 1 1 d D . . 
H9A H 0.5994 0.0548 0.1665 0.145 Uiso 1 1 d R . . 
H9B H 0.5908 0.0865 0.2494 0.145 Uiso 1 1 d R . . 
H9C H 0.6406 0.2134 0.2263 0.145 Uiso 0.50 1 d PR . . 
C10 C 0.6596(5) 0.2228(12) 0.2473(6) 0.045(2) Uani 0.50 1 d PD . . 
H10A H 0.6589 0.3117 0.2079 0.054 Uiso 0.50 1 d PR . . 
H10B H 0.6958 0.1406 0.2530 0.054 Uiso 0.50 1 d PR . . 
C11 C 0.6734(5) 0.3157(14) 0.3311(7) 0.053(2) Uani 0.50 1 d PD . . 
H11A H 0.7135 0.3877 0.3423 0.064 Uiso 0.50 1 d PR . . 
H11B H 0.6867 0.2237 0.3725 0.064 Uiso 0.50 1 d PR . . 
C1A C 0.7359(11) 0.176(3) -0.0786(10) 0.062(3) Uani 0.56 1 d PU . 1 
H1AA H 0.7288 0.1355 -0.1333 0.074 Uiso 0.56 1 d PR . 1 
C2A C 0.7850(9) 0.313(3) -0.0436(14) 0.055(3) Uani 0.56 1 d PU A 1 
H2AA H 0.8130 0.3589 -0.0702 0.066 Uiso 0.56 1 d PR A 1 
C3A C 0.7995(9) 0.387(2) 0.0345(15) 0.065(4) Uani 0.56 1 d PU . 1 
H3AA H 0.8314 0.4824 0.0585 0.078 Uiso 0.56 1 d PR . 1 
C1B C 0.7676(19) 0.249(5) -0.0670(18) 0.075(6) Uani 0.44 1 d PU . 2 
H1BA H 0.7828 0.2606 -0.1112 0.090 Uiso 0.44 1 d PR . 2 
C2B C 0.7998(12) 0.358(3) 0.000(3) 0.069(5) Uani 0.44 1 d PU B 2 
H2BA H 0.8373 0.4363 0.0063 0.082 Uiso 0.44 1 d PR B 2 
C3B C 0.7839(17) 0.363(5) 0.066(2) 0.090(9) Uani 0.44 1 d PU . 2 
H3BA H 0.8036 0.4375 0.1140 0.108 Uiso 0.44 1 d PR . 2 
 
loop_ 
 _atom_site_aniso_label 
 _atom_site_aniso_U_11 
 _atom_site_aniso_U_22 
 _atom_site_aniso_U_33 
 _atom_site_aniso_U_23 
 _atom_site_aniso_U_13 
 _atom_site_aniso_U_12 
Br1 0.0758(4) 0.0754(4) 0.0449(3) 0.0067(3) 0.0161(3) 0.0041(3) 
Br2 0.0833(5) 0.0884(5) 0.0536(4) -0.0041(3) 0.0415(3) 0.0024(3) 
N1 0.087(3) 0.048(2) 0.047(2) 0.0027(19) 0.039(2) 0.008(2) 
N2 0.079(3) 0.058(3) 0.038(2) 0.0000(19) 0.015(2) 0.025(2) 
C1 0.104(5) 0.050(3) 0.038(3) 0.003(2) 0.031(3) 0.010(3) 
C2 0.076(3) 0.038(3) 0.044(3) 0.0003(19) 0.032(3) 0.004(2) 
C3 0.058(3) 0.043(3) 0.051(3) 0.002(2) 0.025(2) 0.003(2) 
C4 0.063(3) 0.043(3) 0.043(2) 0.003(2) 0.019(2) 0.005(2) 
C5 0.063(3) 0.052(3) 0.046(3) -0.003(2) 0.030(2) 0.003(2) 
C6 0.059(3) 0.055(3) 0.053(3) -0.005(2) 0.025(3) 0.006(2) 
C7 0.065(3) 0.046(3) 0.042(3) -0.002(2) 0.019(2) 0.015(2) 
C8 0.093(4) 0.059(4) 0.078(4) -0.002(3) 0.059(4) 0.005(3) 
C9 0.129(6) 0.079(5) 0.058(4) -0.010(3) 0.012(4) 0.060(5) 
C10 0.046(5) 0.035(5) 0.054(5) -0.011(4) 0.020(4) -0.001(4) 
C11 0.040(5) 0.058(6) 0.058(6) -0.005(5) 0.016(4) -0.004(5) 
C1A 0.058(7) 0.056(7) 0.067(6) 0.006(5) 0.021(6) 0.003(6) 
C2A 0.052(6) 0.061(7) 0.053(7) 0.002(6) 0.021(5) 0.009(5) 
C3A 0.069(7) 0.058(7) 0.060(7) 0.006(6) 0.019(6) 0.007(5) 
C1B 0.077(10) 0.077(10) 0.075(9) 0.000(7) 0.035(8) 0.007(8) 
C2B 0.063(8) 0.059(8) 0.080(10) -0.001(8) 0.025(8) 0.008(6) 
C3B 0.088(12) 0.092(12) 0.091(12) 0.002(8) 0.036(8) 0.008(8) 
 
_geom_special_details 
; 
 All esds (except the esd in the dihedral angle between two l.s. planes) 
 are estimated using the full covariance matrix.  The cell esds are taken 
 into account individually in the estimation of esds in distances, angles 
 and torsion angles; correlations between esds in cell parameters are only 
 used when they are defined by crystal symmetry.  An approximate (isotropic) 
 treatment of cell esds is used for estimating esds involving l.s. planes. 
; 
 
loop_ 
 _geom_bond_atom_site_label_1 
 _geom_bond_atom_site_label_2 
 _geom_bond_distance 
 _geom_bond_site_symmetry_2 
 _geom_bond_publ_flag 
Br1 C4 1.892(5) . ? 
Br2 C5 1.897(5) . ? 
N1 C2 1.400(6) . ? 
N1 C1 1.428(8) . ? 
N1 C8 1.460(7) . ? 
N2 C7 1.390(7) . ? 
N2 C1 1.414(8) . ? 
N2 C9 1.461(8) . ? 
C1 C1 1.343(10) 2_655 ? 
C2 C3 1.365(7) . ? 
C2 C7 1.395(8) . ? 
C3 C4 1.420(7) . ? 
C3 H3 0.95 . ? 
C4 C5 1.371(8) . ? 
C5 C6 1.391(8) . ? 
C6 C7 1.376(7) . ? 
C6 H6 0.95 . ? 
C8 C11 1.375(10) 2_655 ? 
C8 H8A 0.96 . ? 
C8 H8B 0.96 . ? 
C8 H8C 0.96 . ? 
C9 C10 1.332(10) . ? 
C9 H9A 0.96 . ? 
C9 H9B 0.96 . ? 
C9 H9C 0.96 . ? 
C10 C11 1.547(14) . ? 
C10 H10A 0.96 . ? 
C10 H10B 0.96 . ? 
C11 C8 1.374(10) 2_655 ? 
C11 H11A 0.96 . ? 
C11 H11B 0.96 . ? 
C1A C3A 1.37(2) 7_655 ? 
C1A C2A 1.42(2) . ? 
C1A H1AA 0.96 . ? 
C2A C3A 1.396(19) . ? 
C2A H2AA 0.96 . ? 
C3A C1A 1.37(2) 7_655 ? 
C3A H3AA 0.96 . ? 
C1B C2B 1.36(3) . ? 
C1B C3B 1.39(3) 7_655 ? 
C1B H1BA 0.96 . ? 
C2B C3B 1.33(3) . ? 
C2B H2BA 0.9601 . ? 
C3B C1B 1.39(3) 7_655 ? 
C3B H3BA 0.96 . ? 
 
loop_ 
 _geom_angle_atom_site_label_1 
 _geom_angle_atom_site_label_2 
 _geom_angle_atom_site_label_3 
 _geom_angle 
 _geom_angle_site_symmetry_1 
 _geom_angle_site_symmetry_3 
 _geom_angle_publ_flag 
C2 N1 C1 107.2(5) . . ? 
C2 N1 C8 120.5(5) . . ? 
C1 N1 C8 121.9(5) . . ? 
C7 N2 C1 108.6(5) . . ? 
C7 N2 C9 120.5(4) . . ? 
C1 N2 C9 122.3(5) . . ? 
C1 C1 N2 126.7(9) 2_655 . ? 
C1 C1 N1 126.2(8) 2_655 . ? 
N2 C1 N1 107.0(4) . . ? 
C3 C2 C7 121.8(5) . . ? 
C3 C2 N1 129.2(5) . . ? 
C7 C2 N1 109.0(5) . . ? 
C2 C3 C4 116.9(5) . . ? 
C2 C3 H3 121.6 . . ? 
C4 C3 H3 121.6 . . ? 
C5 C4 C3 121.2(5) . . ? 
C5 C4 Br1 122.3(4) . . ? 
C3 C4 Br1 116.6(4) . . ? 
C4 C5 C6 121.2(5) . . ? 
C4 C5 Br2 122.1(4) . . ? 
C6 C5 Br2 116.6(4) . . ? 
C7 C6 C5 117.8(5) . . ? 
C7 C6 H6 121.1 . . ? 
C5 C6 H6 121.1 . . ? 
C6 C7 N2 130.6(5) . . ? 
C6 C7 C2 121.2(5) . . ? 
N2 C7 C2 108.2(5) . . ? 
C11 C8 N1 108.5(6) 2_655 . ? 
N1 C8 H8A 109.6 . . ? 
N1 C8 H8B 109.2 . . ? 
H8A C8 H8B 109.6 . . ? 
N1 C8 H8C 109.4 . . ? 
H8A C8 H8C 109.5 . . ? 
H8B C8 H8C 109.5 . . ? 
C10 C9 N2 117.9(7) . . ? 
C10 C9 H9A 115.0 . . ? 
N2 C9 H9A 110.9 . . ? 
C10 C9 H9B 102.1 . . ? 
N2 C9 H9B 100.1 . . ? 
H9A C9 H9B 108.7 . . ? 
N2 C9 H9C 111.5 . . ? 
H9A C9 H9C 112.5 . . ? 
H9B C9 H9C 112.5 . . ? 
C9 C10 C11 119.6(8) . . ? 
C9 C10 H10A 100.7 . . ? 
C11 C10 H10A 108.3 . . ? 
C9 C10 H10B 108.6 . . ? 
C11 C10 H10B 111.1 . . ? 
H9C C10 H10B 114.6 . . ? 
H10A C10 H10B 107.5 . . ? 
C8 C11 C10 124.5(8) 2_655 . ? 
C8 C11 H11A 107.4 2_655 . ? 
C10 C11 H11A 105.0 . . ? 
C8 C11 H11B 105.8 2_655 . ? 
C10 C11 H11B 106.2 . . ? 
H11A C11 H11B 106.8 . . ? 
C3A C1A C2A 118.8(14) 7_655 . ? 
C3A C1A H1AA 124.2 7_655 . ? 
C2A C1A H1AA 117.0 . . ? 
C3A C2A C1A 123.2(15) . . ? 
C3A C2A H2AA 113.7 . . ? 
C1A C2A H2AA 123.0 . . ? 
C1A C3A C2A 118.0(16) 7_655 . ? 
C1A C3A H3AA 117.5 7_655 . ? 
C2A C3A H3AA 124.5 . . ? 
H2BA C3A H3BA 124.0 . . ? 
C2B C1B C3B 118(2) . 7_655 ? 
H1AA C1B H2AA 123.3 . . ? 
C2B C1B H1BA 115.3 . . ? 
C3B C1B H1BA 126.5 7_655 . ? 
C3B C2B C1B 123(2) . . ? 
H2AA C2B H3AA 117.7 . . ? 
C3B C2B H2BA 111.5 . . ? 
C2B C3B C1B 118(3) . 7_655 ? 
C2B C3B H3BA 128.0 . . ? 
C1B C3B H3BA 113.6 7_655 . ? 
 
loop_ 
 _geom_torsion_atom_site_label_1 
 _geom_torsion_atom_site_label_2 
 _geom_torsion_atom_site_label_3 
 _geom_torsion_atom_site_label_4 
 _geom_torsion 
 _geom_torsion_site_symmetry_1 
 _geom_torsion_site_symmetry_2 
 _geom_torsion_site_symmetry_3 
 _geom_torsion_site_symmetry_4 
 _geom_torsion_publ_flag 
C7 N2 C1 C1 -179.9(3) . . . 2_655 ? 
C9 N2 C1 C1 32.2(7) . . . 2_655 ? 
C7 N2 C1 N1 0.3(6) . . . . ? 
C9 N2 C1 N1 -147.6(6) . . . . ? 
C2 N1 C1 C1 179.6(3) . . . 2_655 ? 
C8 N1 C1 C1 34.7(6) . . . 2_655 ? 
C2 N1 C1 N2 -0.5(6) . . . . ? 
C8 N1 C1 N2 -145.5(5) . . . . ? 
C1 N1 C2 C3 -179.0(5) . . . . ? 
C8 N1 C2 C3 -33.5(8) . . . . ? 
C1 N1 C2 C7 0.6(6) . . . . ? 
C8 N1 C2 C7 146.2(5) . . . . ? 
C7 C2 C3 C4 1.2(7) . . . . ? 
N1 C2 C3 C4 -179.3(5) . . . . ? 
C2 C3 C4 C5 -0.9(7) . . . . ? 
C2 C3 C4 Br1 178.7(4) . . . . ? 
C3 C4 C5 C6 -0.2(8) . . . . ? 
Br1 C4 C5 C6 -179.8(4) . . . . ? 
C3 C4 C5 Br2 -178.2(4) . . . . ? 
Br1 C4 C5 Br2 2.3(6) . . . . ? 
C4 C5 C6 C7 1.0(8) . . . . ? 
Br2 C5 C6 C7 179.1(4) . . . . ? 
C5 C6 C7 N2 179.8(5) . . . . ? 
C5 C6 C7 C2 -0.8(8) . . . . ? 
C1 N2 C7 C6 179.6(6) . . . . ? 
C9 N2 C7 C6 -31.8(10) . . . . ? 
C1 N2 C7 C2 0.1(6) . . . . ? 
C9 N2 C7 C2 148.7(6) . . . . ? 
C3 C2 C7 C6 -0.3(8) . . . . ? 
N1 C2 C7 C6 -180.0(5) . . . . ? 
C3 C2 C7 N2 179.2(5) . . . . ? 
N1 C2 C7 N2 -0.5(6) . . . . ? 
C2 N1 C8 C11 116.5(7) . . . 2_655 ? 
C1 N1 C8 C11 -103.1(8) . . . 2_655 ? 
C7 N2 C9 C10 116.0(8) . . . . ? 
C1 N2 C9 C10 -99.8(10) . . . . ? 
N2 C9 C10 C11 67.5(12) . . . . ? 
C9 C10 C11 C8 -41.5(15) . . . 2_655 ? 
C3A C1A C2A C3A 1(2) 7_655 . . . ? 
C1A C2A C3A C1A -1(2) . . . 7_655 ? 
C3B C1B C2B C3B -1(4) 7_655 . . . ? 
C1B C2B C3B C1B 1(4) . . . 7_655 ? 
 
_diffrn_measured_fraction_theta_max    0.999 
_diffrn_reflns_theta_full              27.49 
_diffrn_measured_fraction_theta_full   0.999 
_refine_diff_density_max    0.838 
_refine_diff_density_min   -0.991 
_refine_diff_density_rms    0.094 

#===END

 
data_c-dibr2
 
_audit_creation_method            SHELXL-97
_chemical_name_systematic
;
 ?
;
_chemical_name_common             ?
_chemical_melting_point           ?
_chemical_formula_moiety          ?
_chemical_formula_sum
 'C18 H16 Br4 N4'

_chemical_formula_weight          607.99
 
loop_
 _atom_type_symbol
 _atom_type_description
 _atom_type_scat_dispersion_real
 _atom_type_scat_dispersion_imag
 _atom_type_scat_source
 'C'  'C'   0.0033   0.0016
 'International Tables Vol C Tables 4.2.6.8 and 6.1.1.4'
 'H'  'H'   0.0000   0.0000
 'International Tables Vol C Tables 4.2.6.8 and 6.1.1.4'
 'N'  'N'   0.0061   0.0033
 'International Tables Vol C Tables 4.2.6.8 and 6.1.1.4'
 'Br'  'Br'  -0.2901   2.4595
 'International Tables Vol C Tables 4.2.6.8 and 6.1.1.4'
 
_symmetry_cell_setting            Monoclinic
_symmetry_space_group_name_H-M    C2/c
 
loop_
 _symmetry_equiv_pos_as_xyz
 'x, y, z'
 '-x, y, -z+1/2'
 'x+1/2, y+1/2, z'
 '-x+1/2, y+1/2, -z+1/2'
 '-x, -y, -z'
 'x, -y, z-1/2'
 '-x+1/2, -y+1/2, -z'
 'x+1/2, -y+1/2, z-1/2'
 
_cell_length_a                    36.0899(8)
_cell_length_b                    7.7059(2)
_cell_length_c                    14.9303(3)
_cell_angle_alpha                 90.00
_cell_angle_beta                  108.213(1)
_cell_angle_gamma                 90.00
_cell_volume                      3944.17(16)
_cell_formula_units_Z             8
_cell_measurement_temperature     153(2)
_cell_measurement_reflns_used     3680
_cell_measurement_theta_min       1
_cell_measurement_theta_max       27.5
 
_exptl_crystal_description        prisms
_exptl_crystal_colour             red
_exptl_crystal_size_max           0.14
_exptl_crystal_size_mid           0.09
_exptl_crystal_size_min           0.07
_exptl_crystal_density_meas       ?
_exptl_crystal_density_diffrn     2.048
_exptl_crystal_density_method     'not measured'
_exptl_crystal_F_000              2336
_exptl_absorpt_coefficient_mu     8.173
_exptl_absorpt_correction_type    multi-scan
_exptl_absorpt_correction_T_min   0.47
_exptl_absorpt_correction_T_max   0.56
_exptl_absorpt_process_details    'Denzo and Scalepack'
 
_exptl_special_details
;
 ?
;
 
_diffrn_ambient_temperature       153(2)
_diffrn_radiation_wavelength      0.71073
_diffrn_radiation_type            MoK\a
_diffrn_radiation_source          'fine-focus sealed tube'
_diffrn_radiation_monochromator   graphite
_diffrn_measurement_device_type   'Nonius Kappa CCD'
_diffrn_measurement_method        \w-scans
_diffrn_detector_area_resol_mean  ?
_diffrn_standards_number          ?
_diffrn_standards_interval_count  ?
_diffrn_standards_interval_time   ?
_diffrn_standards_decay_%         ?
_diffrn_reflns_number             4403
_diffrn_reflns_av_R_equivalents   0.0000
_diffrn_reflns_av_sigmaI/netI     0.0655
_diffrn_reflns_limit_h_min        -46
_diffrn_reflns_limit_h_max        46
_diffrn_reflns_limit_k_min        -9
_diffrn_reflns_limit_k_max        9
_diffrn_reflns_limit_l_min        -19
_diffrn_reflns_limit_l_max        18
_diffrn_reflns_theta_min          2.98
_diffrn_reflns_theta_max          27.30
_reflns_number_total              4403
_reflns_number_gt                 3448
_reflns_threshold_expression      >2sigma(I)
 
_publ_section_references
;
Altomare A., Burla M.C., Camalli M., Cascarano G.L., Giacovazzo C., 
Guagliardi A., Moliterni A.G.G., Polidori G.,Spagna R. Sir97.  
(1999) J. Appl. Cryst. 32, 115-119.

Farrugia, L. J. (1999) J. Appl. Cryst., 32, 837-838.

Otwinowski, Z. and Minor, W.  (1997).  Methods in Enzymology,
276, Macromolecular Crystallography, part A, 307-326, C. W. Carter,
Jr. and R. M. Sweets, Eds., Academic Press.

Sheldrick, G. M.  (1998).  SHELXTL/PC.  Release 5.10.  Siemens 
Analytical X-ray Instruments, Inc., Madison, WI, USA.

Spek, A. L. (1998) PLATON, A Multipurpose Crystallographic Tool, Utrecht 
University, Utrecht, The Netherlands. 

;
_computing_data_collection        'Collect software, Nonius B.V. 1998'
_computing_cell_refinement        'Collect software, Nonius B.V. 1998'
_computing_data_reduction         
;
DENZO and Scalepack (Otwinoski and Minor, 1997)
;
_computing_structure_solution     
;

SIR97 - Altomare A., Burla M.C., Camalli M., Cascarano G.L., Giacovazzo C., 
Guagliardi A., Moliterni A.G.G., Polidori G.,Spagna R.
;
_computing_structure_refinement   'XL SHELXTL/PC, Siemens Analytical'
_computing_molecular_graphics     'XP SHELXTL/PC, Siemens Analytical' 
_computing_publication_material   ? 

 
_refine_special_details
;
 Refinement of F^2^ against ALL reflections.  The weighted R-factor wR and
 goodness of fit S are based on F^2^, conventional R-factors R are based
 on F, with F set to zero for negative F^2^. The threshold expression of
 F^2^ > 2sigma(F^2^) is used only for calculating R-factors(gt) etc. and is
 not relevant to the choice of reflections for refinement.  R-factors based
 on F^2^ are statistically about twice as large as those based on F, and R-
 factors based on ALL data will be even larger.

	The crystal was found to be twinned.  The twin law was determined 
using the TwinRotMat utility in PLATON98 (Spek, 1998) to be due to a 180 
degree rotation about the (100) reciprocal lattice direction.  The twin law 
was 1,0,1.5; 0,-1,0; 0,0,-1.  The twin fraction refined to 0.465(2).  PLATON98
 was used as incorporated into WinGX (Farrugia, 1999). 
;
 
_refine_ls_structure_factor_coef  Fsqd
_refine_ls_matrix_type            full
_refine_ls_weighting_scheme       calc
_refine_ls_weighting_details
 'calc w=1/[\s^2^(Fo^2^)+(0.01P)^2^+22.5P] where P=(Fo^2^+2Fc^2^)/3'
_atom_sites_solution_primary      direct
_atom_sites_solution_secondary    difmap
_atom_sites_solution_hydrogens    geom
_refine_ls_hydrogen_treatment     constr
_refine_ls_extinction_method      none
_refine_ls_extinction_coef        ?
_refine_ls_number_reflns          4403
_refine_ls_number_parameters      240
_refine_ls_number_restraints      0
_refine_ls_R_factor_all           0.0846
_refine_ls_R_factor_gt            0.0597
_refine_ls_wR_factor_ref          0.1018
_refine_ls_wR_factor_gt           0.0947
_refine_ls_goodness_of_fit_ref    1.243
_refine_ls_restrained_S_all       1.243
_refine_ls_shift/su_max           0.002
_refine_ls_shift/su_mean          0.000
 
loop_
 _atom_site_label
 _atom_site_type_symbol
 _atom_site_fract_x
 _atom_site_fract_y
 _atom_site_fract_z
 _atom_site_U_iso_or_equiv
 _atom_site_adp_type
 _atom_site_occupancy
 _atom_site_symmetry_multiplicity
 _atom_site_calc_flag
 _atom_site_refinement_flags
 _atom_site_disorder_assembly
 _atom_site_disorder_group
Br1 Br 0.422729(19) 0.71432(10) 0.36348(5) 0.02531(18) Uani 1 1 d . . .
Br2 Br 0.43768(2) 0.87415(10) 0.58247(5) 0.02626(18) Uani 1 1 d . . .
Br3 Br 0.821134(19) 0.52781(9) 0.58956(5) 0.02533(18) Uani 1 1 d . . .
Br4 Br 0.826556(19) 0.89363(9) 0.72150(5) 0.02489(17) Uani 1 1 d . . .
N1 N 0.57774(15) 0.6424(7) 0.4762(4) 0.0185(12) Uani 1 1 d . . .
N2 N 0.58800(15) 0.7805(7) 0.6170(4) 0.0181(12) Uani 1 1 d . . .
N3 N 0.66827(15) 0.5824(7) 0.5360(4) 0.0171(12) Uani 1 1 d . . .
N4 N 0.67303(15) 0.8114(7) 0.6377(4) 0.0171(11) Uani 1 1 d . . .
C1 C 0.60715(18) 0.7039(8) 0.5566(4) 0.0161(13) Uani 1 1 d . . .
C2 C 0.54184(18) 0.6901(8) 0.4844(4) 0.0156(13) Uani 1 1 d . . .
C3 C 0.50454(19) 0.6726(8) 0.4227(5) 0.0189(14) Uani 1 1 d . . .
H3 H 0.5002 0.6221 0.3622 0.023 Uiso 1 1 calc R . .
C4 C 0.47344(18) 0.7311(8) 0.4514(4) 0.0176(14) Uani 1 1 d . . .
C5 C 0.47964(19) 0.7996(9) 0.5390(5) 0.0206(15) Uani 1 1 d . . .
C6 C 0.51745(19) 0.8208(8) 0.6031(5) 0.0189(14) Uani 1 1 d . . .
H6 H 0.5216 0.8692 0.6640 0.023 Uiso 1 1 calc R . .
C7 C 0.54790(18) 0.7679(8) 0.5730(4) 0.0164(14) Uani 1 1 d . . .
C8 C 0.5828(2) 0.6456(9) 0.3820(4) 0.0220(15) Uani 1 1 d . . .
H8A H 0.5736 0.5358 0.3495 0.033 Uiso 1 1 calc R . .
H8B H 0.6104 0.6616 0.3885 0.033 Uiso 1 1 calc R . .
H8C H 0.5676 0.7417 0.3452 0.033 Uiso 1 1 calc R . .
C9 C 0.6034(2) 0.7662(10) 0.7202(4) 0.0241(16) Uani 1 1 d . . .
H9A H 0.5957 0.8688 0.7490 0.036 Uiso 1 1 calc R . .
H9B H 0.6319 0.7582 0.7397 0.036 Uiso 1 1 calc R . .
H9C H 0.5927 0.6619 0.7408 0.036 Uiso 1 1 calc R . .
C10 C 0.64611(18) 0.6981(8) 0.5742(4) 0.0155(13) Uani 1 1 d . . .
C11 C 0.70722(18) 0.6262(8) 0.5760(4) 0.0157(13) Uani 1 1 d . . .
C12 C 0.73991(18) 0.5522(8) 0.5633(4) 0.0178(14) Uani 1 1 d . . .
H12 H 0.7380 0.4531 0.5242 0.021 Uiso 1 1 calc R . .
C13 C 0.77632(17) 0.6280(8) 0.6101(4) 0.0170(14) Uani 1 1 d . . .
C14 C 0.77900(18) 0.7740(8) 0.6654(5) 0.0192(14) Uani 1 1 d . . .
C15 C 0.74561(18) 0.8449(8) 0.6805(5) 0.0200(15) Uani 1 1 d . . .
H15 H 0.7474 0.9435 0.7197 0.024 Uiso 1 1 calc R . .
C16 C 0.71036(18) 0.7678(8) 0.6369(4) 0.0163(13) Uani 1 1 d . . .
C17 C 0.6557(2) 0.4065(9) 0.5074(5) 0.0281(17) Uani 1 1 d . . .
H17A H 0.6561 0.3870 0.4428 0.042 Uiso 1 1 calc R . .
H17B H 0.6291 0.3894 0.5100 0.042 Uiso 1 1 calc R . .
H17C H 0.6734 0.3242 0.5500 0.042 Uiso 1 1 calc R . .
C18 C 0.6629(2) 0.9950(9) 0.6441(5) 0.0220(14) Uani 1 1 d . . .
H18A H 0.6538 1.0113 0.6990 0.033 Uiso 1 1 calc R . .
H18B H 0.6421 1.0284 0.5867 0.033 Uiso 1 1 calc R . .
H18C H 0.6859 1.0673 0.6510 0.033 Uiso 1 1 calc R . .
 
loop_
 _atom_site_aniso_label
 _atom_site_aniso_U_11
 _atom_site_aniso_U_22
 _atom_site_aniso_U_33
 _atom_site_aniso_U_23
 _atom_site_aniso_U_13
 _atom_site_aniso_U_12
Br1 0.0160(3) 0.0330(4) 0.0246(4) -0.0015(3) 0.0030(3) -0.0006(3)
Br2 0.0202(3) 0.0306(4) 0.0316(4) -0.0037(3) 0.0133(3) -0.0001(3)
Br3 0.0206(3) 0.0283(4) 0.0284(4) 0.0025(3) 0.0096(3) 0.0076(3)
Br4 0.0167(3) 0.0250(4) 0.0308(4) -0.0001(3) 0.0042(3) -0.0030(3)
N1 0.019(3) 0.020(3) 0.016(3) -0.005(2) 0.003(2) -0.001(2)
N2 0.017(3) 0.025(3) 0.014(3) -0.002(2) 0.009(2) -0.006(2)
N3 0.011(3) 0.015(3) 0.025(3) -0.004(2) 0.004(2) -0.002(2)
N4 0.016(3) 0.013(3) 0.023(3) -0.004(2) 0.007(2) -0.002(2)
C1 0.019(3) 0.016(3) 0.013(3) -0.003(3) 0.004(3) -0.002(3)
C2 0.017(3) 0.013(3) 0.018(3) 0.004(3) 0.008(3) 0.001(3)
C3 0.021(3) 0.018(3) 0.018(3) -0.003(3) 0.006(3) 0.001(3)
C4 0.013(3) 0.015(3) 0.021(3) 0.002(3) 0.000(3) 0.000(3)
C5 0.020(3) 0.020(4) 0.027(4) 0.005(3) 0.015(3) 0.001(3)
C6 0.022(3) 0.018(3) 0.019(3) -0.002(3) 0.010(3) -0.003(3)
C7 0.019(3) 0.013(3) 0.016(3) 0.000(3) 0.003(3) -0.002(3)
C8 0.025(4) 0.029(4) 0.015(3) -0.007(3) 0.011(3) -0.003(3)
C9 0.022(4) 0.033(4) 0.017(3) -0.008(3) 0.006(3) -0.006(3)
C10 0.020(3) 0.013(3) 0.012(3) -0.001(3) 0.003(3) 0.001(3)
C11 0.014(3) 0.018(3) 0.014(3) 0.006(3) 0.003(3) 0.001(3)
C12 0.019(3) 0.016(3) 0.018(3) 0.002(3) 0.006(3) 0.000(3)
C13 0.013(3) 0.021(3) 0.018(3) 0.007(3) 0.006(3) 0.008(3)
C14 0.017(3) 0.018(3) 0.023(4) 0.007(3) 0.007(3) 0.000(3)
C15 0.015(3) 0.019(3) 0.024(4) -0.003(3) 0.003(3) -0.002(3)
C16 0.013(3) 0.015(3) 0.020(3) 0.002(3) 0.004(3) 0.001(3)
C17 0.031(4) 0.020(4) 0.036(4) -0.007(3) 0.013(3) -0.006(3)
C18 0.027(3) 0.018(3) 0.021(3) -0.001(3) 0.007(3) 0.002(3)
 
_geom_special_details
;
 All esds (except the esd in the dihedral angle between two l.s. planes)
 are estimated using the full covariance matrix.  The cell esds are taken
 into account individually in the estimation of esds in distances, angles
 and torsion angles; correlations between esds in cell parameters are only
 used when they are defined by crystal symmetry.  An approximate (isotropic)
 treatment of cell esds is used for estimating esds involving l.s. planes.
;
 
loop_
 _geom_bond_atom_site_label_1
 _geom_bond_atom_site_label_2
 _geom_bond_distance
 _geom_bond_site_symmetry_2
 _geom_bond_publ_flag
Br1 C4 1.894(6) . ?
Br2 C5 1.913(6) . ?
Br3 C13 1.901(6) . ?
Br4 C14 1.897(6) . ?
N1 C2 1.389(8) . ?
N1 C1 1.412(8) . ?
N1 C8 1.474(8) . ?
N2 C7 1.393(8) . ?
N2 C1 1.425(8) . ?
N2 C9 1.469(8) . ?
N3 C11 1.386(8) . ?
N3 C10 1.429(8) . ?
N3 C17 1.451(8) . ?
N4 C16 1.392(8) . ?
N4 C10 1.424(8) . ?
N4 C18 1.472(8) . ?
C1 C10 1.348(8) . ?
C2 C3 1.380(9) . ?
C2 C7 1.406(9) . ?
C3 C4 1.395(9) . ?
C3 H3 0.9500 . ?
C4 C5 1.363(9) . ?
C5 C6 1.410(9) . ?
C6 C7 1.373(9) . ?
C6 H6 0.9500 . ?
C8 H8A 0.9800 . ?
C8 H8B 0.9800 . ?
C8 H8C 0.9800 . ?
C9 H9A 0.9800 . ?
C9 H9B 0.9800 . ?
C9 H9C 0.9800 . ?
C11 C12 1.376(9) . ?
C11 C16 1.403(9) . ?
C12 C13 1.408(9) . ?
C12 H12 0.9500 . ?
C13 C14 1.381(9) . ?
C14 C15 1.404(9) . ?
C15 C16 1.370(8) . ?
C15 H15 0.9500 . ?
C17 H17A 0.9800 . ?
C17 H17B 0.9800 . ?
C17 H17C 0.9800 . ?
C18 H18A 0.9800 . ?
C18 H18B 0.9800 . ?
C18 H18C 0.9800 . ?
 
loop_
 _geom_angle_atom_site_label_1
 _geom_angle_atom_site_label_2
 _geom_angle_atom_site_label_3
 _geom_angle
 _geom_angle_site_symmetry_1
 _geom_angle_site_symmetry_3
 _geom_angle_publ_flag
C2 N1 C1 108.1(5) . . ?
C2 N1 C8 118.5(5) . . ?
C1 N1 C8 121.4(5) . . ?
C7 N2 C1 108.1(5) . . ?
C7 N2 C9 119.0(5) . . ?
C1 N2 C9 122.3(5) . . ?
C11 N3 C10 107.2(5) . . ?
C11 N3 C17 122.4(5) . . ?
C10 N3 C17 122.5(5) . . ?
C16 N4 C10 107.9(5) . . ?
C16 N4 C18 119.6(5) . . ?
C10 N4 C18 120.1(5) . . ?
C10 C1 N1 128.0(6) . . ?
C10 C1 N2 125.0(6) . . ?
N1 C1 N2 107.0(5) . . ?
C3 C2 N1 131.1(6) . . ?
C3 C2 C7 120.2(6) . . ?
N1 C2 C7 108.7(5) . . ?
C2 C3 C4 118.3(6) . . ?
C2 C3 H3 120.9 . . ?
C4 C3 H3 120.8 . . ?
C5 C4 C3 120.9(6) . . ?
C5 C4 Br1 121.7(5) . . ?
C3 C4 Br1 117.5(5) . . ?
C4 C5 C6 122.1(6) . . ?
C4 C5 Br2 122.2(5) . . ?
C6 C5 Br2 115.8(5) . . ?
C7 C6 C5 116.5(6) . . ?
C7 C6 H6 121.7 . . ?
C5 C6 H6 121.7 . . ?
C6 C7 N2 130.1(6) . . ?
C6 C7 C2 122.0(6) . . ?
N2 C7 C2 107.9(5) . . ?
N1 C8 H8A 109.5 . . ?
N1 C8 H8B 109.5 . . ?
H8A C8 H8B 109.5 . . ?
N1 C8 H8C 109.5 . . ?
H8A C8 H8C 109.5 . . ?
H8B C8 H8C 109.5 . . ?
N2 C9 H9A 109.5 . . ?
N2 C9 H9B 109.5 . . ?
H9A C9 H9B 109.5 . . ?
N2 C9 H9C 109.5 . . ?
H9A C9 H9C 109.5 . . ?
H9B C9 H9C 109.5 . . ?
C1 C10 N4 124.2(6) . . ?
C1 C10 N3 128.5(6) . . ?
N4 C10 N3 107.3(5) . . ?
C12 C11 N3 129.6(6) . . ?
C12 C11 C16 120.9(6) . . ?
N3 C11 C16 109.5(5) . . ?
C11 C12 C13 117.8(6) . . ?
C11 C12 H12 121.1 . . ?
C13 C12 H12 121.1 . . ?
C14 C13 C12 121.0(6) . . ?
C14 C13 Br3 121.5(5) . . ?
C12 C13 Br3 117.4(5) . . ?
C13 C14 C15 120.6(6) . . ?
C13 C14 Br4 123.0(5) . . ?
C15 C14 Br4 116.3(5) . . ?
C16 C15 C14 118.2(6) . . ?
C16 C15 H15 120.9 . . ?
C14 C15 H15 120.9 . . ?
C15 C16 N4 130.5(6) . . ?
C15 C16 C11 121.3(6) . . ?
N4 C16 C11 108.1(5) . . ?
N3 C17 H17A 109.5 . . ?
N3 C17 H17B 109.5 . . ?
H17A C17 H17B 109.5 . . ?
N3 C17 H17C 109.5 . . ?
H17A C17 H17C 109.5 . . ?
H17B C17 H17C 109.5 . . ?
N4 C18 H18A 109.5 . . ?
N4 C18 H18B 109.5 . . ?
H18A C18 H18B 109.5 . . ?
N4 C18 H18C 109.5 . . ?
H18A C18 H18C 109.5 . . ?
H18B C18 H18C 109.5 . . ?
 
loop_
 _geom_torsion_atom_site_label_1
 _geom_torsion_atom_site_label_2
 _geom_torsion_atom_site_label_3
 _geom_torsion_atom_site_label_4
 _geom_torsion
 _geom_torsion_site_symmetry_1
 _geom_torsion_site_symmetry_2
 _geom_torsion_site_symmetry_3
 _geom_torsion_site_symmetry_4
 _geom_torsion_publ_flag
C2 N1 C1 C10 -174.5(6) . . . . ?
C8 N1 C1 C10 -32.6(10) . . . . ?
C2 N1 C1 N2 3.8(7) . . . . ?
C8 N1 C1 N2 145.6(6) . . . . ?
C7 N2 C1 C10 177.3(6) . . . . ?
C9 N2 C1 C10 -38.5(10) . . . . ?
C7 N2 C1 N1 -1.0(7) . . . . ?
C9 N2 C1 N1 143.1(6) . . . . ?
C1 N1 C2 C3 174.8(7) . . . . ?
C8 N1 C2 C3 31.7(10) . . . . ?
C1 N1 C2 C7 -5.1(7) . . . . ?
C8 N1 C2 C7 -148.3(6) . . . . ?
N1 C2 C3 C4 178.9(6) . . . . ?
C7 C2 C3 C4 -1.1(9) . . . . ?
C2 C3 C4 C5 -1.6(10) . . . . ?
C2 C3 C4 Br1 177.5(5) . . . . ?
C3 C4 C5 C6 2.4(10) . . . . ?
Br1 C4 C5 C6 -176.7(5) . . . . ?
C3 C4 C5 Br2 -177.9(5) . . . . ?
Br1 C4 C5 Br2 3.0(8) . . . . ?
C4 C5 C6 C7 -0.3(10) . . . . ?
Br2 C5 C6 C7 180.0(5) . . . . ?
C5 C6 C7 N2 175.9(6) . . . . ?
C5 C6 C7 C2 -2.5(10) . . . . ?
C1 N2 C7 C6 179.3(7) . . . . ?
C9 N2 C7 C6 33.8(10) . . . . ?
C1 N2 C7 C2 -2.1(7) . . . . ?
C9 N2 C7 C2 -147.6(6) . . . . ?
C3 C2 C7 C6 3.3(10) . . . . ?
N1 C2 C7 C6 -176.8(6) . . . . ?
C3 C2 C7 N2 -175.5(6) . . . . ?
N1 C2 C7 N2 4.5(7) . . . . ?
N1 C1 C10 N4 157.0(6) . . . . ?
N2 C1 C10 N4 -21.0(10) . . . . ?
N1 C1 C10 N3 -23.5(11) . . . . ?
N2 C1 C10 N3 158.5(6) . . . . ?
C16 N4 C10 C1 -179.5(6) . . . . ?
C18 N4 C10 C1 -37.7(9) . . . . ?
C16 N4 C10 N3 0.9(7) . . . . ?
C18 N4 C10 N3 142.8(5) . . . . ?
C11 N3 C10 C1 -179.4(6) . . . . ?
C17 N3 C10 C1 -29.9(10) . . . . ?
C11 N3 C10 N4 0.1(6) . . . . ?
C17 N3 C10 N4 149.6(6) . . . . ?
C10 N3 C11 C12 178.9(6) . . . . ?
C17 N3 C11 C12 29.4(10) . . . . ?
C10 N3 C11 C16 -1.1(7) . . . . ?
C17 N3 C11 C16 -150.6(6) . . . . ?
N3 C11 C12 C13 177.2(6) . . . . ?
C16 C11 C12 C13 -2.8(9) . . . . ?
C11 C12 C13 C14 -1.2(9) . . . . ?
C11 C12 C13 Br3 -178.6(4) . . . . ?
C12 C13 C14 C15 3.4(10) . . . . ?
Br3 C13 C14 C15 -179.3(5) . . . . ?
C12 C13 C14 Br4 -174.5(5) . . . . ?
Br3 C13 C14 Br4 2.8(8) . . . . ?
C13 C14 C15 C16 -1.5(10) . . . . ?
Br4 C14 C15 C16 176.5(5) . . . . ?
C14 C15 C16 N4 -178.7(6) . . . . ?
C14 C15 C16 C11 -2.5(9) . . . . ?
C10 N4 C16 C15 175.0(7) . . . . ?
C18 N4 C16 C15 32.9(10) . . . . ?
C10 N4 C16 C11 -1.6(7) . . . . ?
C18 N4 C16 C11 -143.6(6) . . . . ?
C12 C11 C16 C15 4.7(9) . . . . ?
N3 C11 C16 C15 -175.3(6) . . . . ?
C12 C11 C16 N4 -178.3(6) . . . . ?
N3 C11 C16 N4 1.7(7) . . . . ?
 
_diffrn_measured_fraction_theta_max    0.991
_diffrn_reflns_theta_full              27.30
_diffrn_measured_fraction_theta_full   0.991
_refine_diff_density_max    0.948
_refine_diff_density_min   -1.806
_refine_diff_density_rms    0.227

#===END

 
data_jkdicl 
 
_audit_creation_method            SHELXL-97 
_chemical_name_systematic 
; 
 ? 
; 
_chemical_name_common             ? 
_chemical_melting_point           ? 
_chemical_formula_moiety          
 'C18 H18 N4 O Cl4, C6 H6'
_chemical_formula_sum 
 'C24 H24 Cl4 N4 O' 
_chemical_formula_weight          526.27 
 
loop_ 
 _atom_type_symbol 
 _atom_type_description 
 _atom_type_scat_dispersion_real 
 _atom_type_scat_dispersion_imag 
 _atom_type_scat_source 
 'C'  'C'   0.0033   0.0016 
 'International Tables Vol C Tables 4.2.6.8 and 6.1.1.4' 
 'H'  'H'   0.0000   0.0000 
 'International Tables Vol C Tables 4.2.6.8 and 6.1.1.4' 
 'N'  'N'   0.0061   0.0033 
 'International Tables Vol C Tables 4.2.6.8 and 6.1.1.4' 
 'O'  'O'   0.0106   0.0060 
 'International Tables Vol C Tables 4.2.6.8 and 6.1.1.4' 
 'Cl'  'Cl'   0.1484   0.1585 
 'International Tables Vol C Tables 4.2.6.8 and 6.1.1.4' 
 
_symmetry_cell_setting            Triclinic 
_symmetry_space_group_name_H-M    P-1
 
loop_ 
 _symmetry_equiv_pos_as_xyz 
 'x, y, z' 
 '-x, -y, -z' 
 
_cell_length_a                    11.2612(2) 
_cell_length_b                    11.6629(3) 
_cell_length_c                    11.9967(3) 
_cell_angle_alpha                 80.504(2) 
_cell_angle_beta                  63.344(2) 
_cell_angle_gamma                 63.165(2) 
_cell_volume                      1255.12(5) 
_cell_formula_units_Z             2 
_cell_measurement_temperature     153(2) 
_cell_measurement_reflns_used     3629
_cell_measurement_theta_min       1
_cell_measurement_theta_max       27.5 
 
_exptl_crystal_description        prisms 
_exptl_crystal_colour             colorless
_exptl_crystal_size_max           0.20 
_exptl_crystal_size_mid           0.20 
_exptl_crystal_size_min           0.19 
_exptl_crystal_density_meas       ? 
_exptl_crystal_density_diffrn     1.393 
_exptl_crystal_density_method     'not measured' 
_exptl_crystal_F_000              544 
_exptl_absorpt_coefficient_mu     0.496 
_exptl_absorpt_correction_type    none 
_exptl_absorpt_correction_T_min   ? 
_exptl_absorpt_correction_T_max   ? 
_exptl_absorpt_process_details    ? 
 
_exptl_special_details 
; 
 ? 
; 
 
_diffrn_ambient_temperature       153(2) 
_diffrn_radiation_wavelength      0.71073 
_diffrn_radiation_type            MoK\a 
_diffrn_radiation_source          'fine-focus sealed tube' 
_diffrn_radiation_monochromator   graphite 
_diffrn_measurement_device_type   'Nonius Kappa CCD'
_diffrn_measurement_method        \w-scans
_diffrn_detector_area_resol_mean  ? 
_diffrn_standards_number          ? 
_diffrn_standards_interval_count  ? 
_diffrn_standards_interval_time   ? 
_diffrn_standards_decay_%         ? 
_diffrn_reflns_number             8494 
_diffrn_reflns_av_R_equivalents   0.0265 
_diffrn_reflns_av_sigmaI/netI     0.0470 
_diffrn_reflns_limit_h_min        -14 
_diffrn_reflns_limit_h_max        14 
_diffrn_reflns_limit_k_min        -15 
_diffrn_reflns_limit_k_max        15 
_diffrn_reflns_limit_l_min        -15 
_diffrn_reflns_limit_l_max        15 
_diffrn_reflns_theta_min          1.96 
_diffrn_reflns_theta_max          27.43 
_reflns_number_total              5664 
_reflns_number_gt                 4437 
_reflns_threshold_expression      >2sigma(I) 
 
_publ_section_references
;
Altomare A., Burla M.C., Camalli M., Cascarano G.L., Giacovazzo C., 
Guagliardi A., Moliterni A.G.G., Polidori G.,Spagna R. Sir97.  
(1999) J. Appl. Cryst. 32, 115-119.

Otwinowski, Z. and Minor, W.  (1997).  Methods in Enzymology,
276, Macromolecular Crystallography, part A, 307-326, C. W. Carter,
Jr. and R. M. Sweets, Eds., Academic Press.

Sheldrick, G. M.  (1998).  SHELXTL/PC.  Release 5.10.  Siemens 
Analytical X-ray Instruments, Inc., Madison, WI, USA.


;
_computing_data_collection        'Collect software, Nonius B.V. 1998'
_computing_cell_refinement        'Collect software, Nonius B.V. 1998'
_computing_data_reduction         
;
DENZO and Scalepack (Otwinoski and Minor, 1997)
;
_computing_structure_solution     
;

SIR97 - Altomare A., Burla M.C., Camalli M., Cascarano G.L., Giacovazzo C., 
Guagliardi A., Moliterni A.G.G., Polidori G.,Spagna R.
;
_computing_structure_refinement   'XL SHELXTL/PC, Siemens Analytical'
_computing_molecular_graphics     'XP SHELXTL/PC, Siemens Analytical' 
_computing_publication_material   ? 

 
_refine_special_details 
; 
 Refinement of F^2^ against ALL reflections.  The weighted R-factor wR and 
 goodness of fit S are based on F^2^, conventional R-factors R are based 
 on F, with F set to zero for negative F^2^. The threshold expression of 
 F^2^ > 2sigma(F^2^) is used only for calculating R-factors(gt) etc. and is 
 not relevant to the choice of reflections for refinement.  R-factors based 
 on F^2^ are statistically about twice as large as those based on F, and R- 
 factors based on ALL data will be even larger. 

A molecule of benzene solvate was found to be disordered about two 
orientations.  The site occupancy factor for these two orientations were 
refined by assigning the variable x to the site occupancy factor of one 
component of the disorder and (1-x) to the other component.  A common 
isotropic displacement parameter was refined for all 12 atoms of the two 
orientations.  In this way, the site occupancy for the major component 
refined to 59(2)%.  The geometry of the two benzene rings was idealized 
throughout the refinement procedure.


; 
 
_refine_ls_structure_factor_coef  Fsqd  
_refine_ls_matrix_type            full 
_refine_ls_weighting_scheme       calc  
_refine_ls_weighting_details 
 'calc w=1/[\s^2^(Fo^2^)+(0.0416P)^2^+0.4780P] where P=(Fo^2^+2Fc^2^)/3' 
_atom_sites_solution_primary      direct 
_atom_sites_solution_secondary    difmap 
_atom_sites_solution_hydrogens    geom 
_refine_ls_hydrogen_treatment     mixed 
_refine_ls_extinction_method      SHELXL 
_refine_ls_extinction_coef        0.007(2) 
_refine_ls_extinction_expression 
 'Fc^*^=kFc[1+0.001xFc^2^\l^3^/sin(2\q)]^-1/4^' 
_refine_ls_number_reflns          5664 
_refine_ls_number_parameters      337 
_refine_ls_number_restraints      72 
_refine_ls_R_factor_all           0.0534 
_refine_ls_R_factor_gt            0.0381 
_refine_ls_wR_factor_ref          0.1023 
_refine_ls_wR_factor_gt           0.0930 
_refine_ls_goodness_of_fit_ref    1.015 
_refine_ls_restrained_S_all       1.018 
_refine_ls_shift/su_max           0.006 
_refine_ls_shift/su_mean          0.000 
 
loop_ 
 _atom_site_label 
 _atom_site_type_symbol 
 _atom_site_fract_x 
 _atom_site_fract_y 
 _atom_site_fract_z 
 _atom_site_U_iso_or_equiv 
 _atom_site_adp_type 
 _atom_site_occupancy 
 _atom_site_symmetry_multiplicity 
 _atom_site_calc_flag 
 _atom_site_refinement_flags 
 _atom_site_disorder_assembly 
 _atom_site_disorder_group 
Cl1 Cl 0.88506(5) -0.36265(4) 0.46903(5) 0.04153(14) Uani 1 1 d . . . 
Cl2 Cl 0.85587(5) -0.27607(5) 0.21405(4) 0.04362(15) Uani 1 1 d . . . 
Cl3 Cl 1.11800(5) -0.14679(4) 0.30475(4) 0.03811(14) Uani 1 1 d . . . 
Cl4 Cl 1.16759(6) -0.05551(6) 0.03002(5) 0.05891(19) Uani 1 1 d . . . 
O1 O 0.51431(13) 0.42009(12) 0.62320(11) 0.0330(3) Uani 1 1 d . . . 
N1 N 0.59835(18) 0.12388(14) 0.59731(13) 0.0337(3) Uani 1 1 d . . . 
N2 N 0.58489(16) 0.18743(13) 0.41231(13) 0.0287(3) Uani 1 1 d . . . 
N3 N 0.73341(15) 0.31901(13) 0.46106(12) 0.0269(3) Uani 1 1 d . . . 
N4 N 0.78340(18) 0.39469(16) 0.21765(15) 0.0394(4) Uani 1 1 d . . . 
C1 C 0.53789(18) 0.23857(16) 0.53480(15) 0.0276(4) Uani 1 1 d . . . 
H1 H 0.4281 0.2781 0.5789 0.033 Uiso 1 1 calc R . . 
C2 C 0.66093(18) 0.01525(16) 0.52273(15) 0.0273(3) Uani 1 1 d . . . 
C3 C 0.73044(19) -0.11215(16) 0.54283(16) 0.0299(4) Uani 1 1 d . . . 
H3 H 0.7373 -0.1386 0.6198 0.036 Uiso 1 1 calc R . . 
C4 C 0.79114(18) -0.20217(16) 0.44552(17) 0.0300(4) Uani 1 1 d . . . 
C5 C 0.77990(18) -0.16387(17) 0.33419(16) 0.0299(4) Uani 1 1 d . . . 
C6 C 0.70904(18) -0.03334(17) 0.31348(15) 0.0286(4) Uani 1 1 d . . . 
H6 H 0.7012 -0.0070 0.2368 0.034 Uiso 1 1 calc R . . 
C7 C 0.65142(17) 0.05492(16) 0.40809(15) 0.0257(3) Uani 1 1 d . . . 
C8 C 0.5486(2) 0.12488(19) 0.73146(16) 0.0351(4) Uani 1 1 d . . . 
H8A H 0.4637 0.1043 0.7706 0.053 Uiso 1 1 calc R . . 
H8B H 0.5204 0.2103 0.7622 0.053 Uiso 1 1 calc R . . 
H8C H 0.6282 0.0607 0.7524 0.053 Uiso 1 1 calc R . . 
C9 C 0.5296(2) 0.26274(17) 0.32350(16) 0.0324(4) Uani 1 1 d . . . 
H9A H 0.6068 0.2346 0.2385 0.049 Uiso 1 1 calc R . . 
H9B H 0.4998 0.3539 0.3382 0.049 Uiso 1 1 calc R . . 
H9C H 0.4446 0.2509 0.3335 0.049 Uiso 1 1 calc R . . 
C10 C 0.59524(18) 0.33482(15) 0.53952(15) 0.0260(3) Uani 1 1 d . . . 
C11 C 0.7852(2) 0.40674(18) 0.48014(18) 0.0375(4) Uani 1 1 d . . . 
H11A H 0.7399 0.4913 0.4497 0.056 Uiso 1 1 calc R . . 
H11B H 0.8924 0.3718 0.4340 0.056 Uiso 1 1 calc R . . 
H11C H 0.7576 0.4153 0.5693 0.056 Uiso 1 1 calc R . . 
C12 C 0.83605(17) 0.22576(16) 0.35804(15) 0.0270(3) Uani 1 1 d . . . 
C13 C 0.91809(17) 0.10058(16) 0.37755(15) 0.0273(3) Uani 1 1 d . . . 
H13 H 0.9040 0.0747 0.4602 0.033 Uiso 1 1 calc R . . 
C14 C 1.02157(18) 0.01164(16) 0.27714(16) 0.0295(4) Uani 1 1 d . . . 
C15 C 1.04255(19) 0.05199(18) 0.15774(16) 0.0350(4) Uani 1 1 d . . . 
C16 C 0.9639(2) 0.17848(19) 0.13608(17) 0.0384(4) Uani 1 1 d . . . 
H16 H 0.9812 0.2039 0.0529 0.046 Uiso 1 1 calc R . . 
C17 C 0.85936(18) 0.26890(17) 0.23580(16) 0.0309(4) Uani 1 1 d . . . 
C18 C 0.7929(3) 0.4401(2) 0.09559(19) 0.0596(7) Uani 1 1 d . . . 
H18A H 0.8929 0.4312 0.0418 0.089 Uiso 1 1 calc R . . 
H18B H 0.7231 0.5308 0.1036 0.089 Uiso 1 1 calc R . . 
H18C H 0.7691 0.3891 0.0586 0.089 Uiso 1 1 calc R . . 
C1A C 0.4739(4) 0.3144(8) 0.0471(9) 0.065(3) Uani 0.59 1 d PGU A 1 
H1A H 0.5768 0.2930 0.0008 0.078 Uiso 0.59 1 d PR A 1 
C2A C 0.4143(6) 0.2320(6) 0.0493(8) 0.069(2) Uani 0.59 1 d PGU A 1 
H2A H 0.4764 0.1512 0.0023 0.083 Uiso 0.59 1 d PR A 1 
C3A C 0.2648(6) 0.2666(4) 0.1195(6) 0.0696(17) Uani 0.59 1 d PGU A 1 
H3A H 0.2237 0.2097 0.1210 0.084 Uiso 0.59 1 d PR A 1 
C4A C 0.1749(3) 0.3836(4) 0.1876(4) 0.0562(16) Uani 0.59 1 d PGU A 1 
H4A H 0.0717 0.4075 0.2361 0.067 Uiso 0.59 1 d PR A 1 
C5A C 0.2345(5) 0.4660(4) 0.1854(4) 0.0515(13) Uani 0.59 1 d PGU A 1 
H5A H 0.1725 0.5468 0.2324 0.062 Uiso 0.59 1 d PR A 1 
C6A C 0.3840(5) 0.4314(6) 0.1152(7) 0.0619(17) Uani 0.59 1 d PGU A 1 
H6A H 0.4252 0.4883 0.1137 0.074 Uiso 0.59 1 d PR A 1 
C1B C 0.2054(6) 0.4235(6) 0.1859(6) 0.050(2) Uani 0.41 1 d PGU B 2 
H1B H 0.1245 0.4986 0.2362 0.059 Uiso 0.41 1 d PR B 2 
C2B C 0.1853(6) 0.3213(7) 0.1647(6) 0.069(2) Uani 0.41 1 d PGU B 2 
H2B H 0.0883 0.3252 0.1996 0.082 Uiso 0.41 1 d PR B 2 
C3B C 0.3057(8) 0.2133(7) 0.0930(8) 0.074(3) Uani 0.41 1 d PGU B 2 
H3B H 0.2918 0.1428 0.0784 0.089 Uiso 0.41 1 d PR B 2 
C4B C 0.4461(7) 0.2076(9) 0.0425(11) 0.059(3) Uani 0.41 1 d PGU B 2 
H4B H 0.5293 0.1331 -0.0070 0.071 Uiso 0.41 1 d PR B 2 
C5B C 0.4662(6) 0.3098(11) 0.0637(12) 0.056(3) Uani 0.41 1 d PGU B 2 
H5B H 0.5633 0.3059 0.0289 0.067 Uiso 0.41 1 d PR B 2 
C6B C 0.3459(8) 0.4178(8) 0.1354(9) 0.058(2) Uani 0.41 1 d PGU B 2 
H6B H 0.3597 0.4883 0.1500 0.070 Uiso 0.41 1 d PR B 2 
H4N H 0.707(2) 0.437(2) 0.279(2) 0.043(6) Uiso 1 1 d . . . 
 
loop_ 
 _atom_site_aniso_label 
 _atom_site_aniso_U_11 
 _atom_site_aniso_U_22 
 _atom_site_aniso_U_33 
 _atom_site_aniso_U_23 
 _atom_site_aniso_U_13 
 _atom_site_aniso_U_12 
Cl1 0.0403(3) 0.0224(2) 0.0563(3) 0.0002(2) -0.0204(2) -0.00867(19) 
Cl2 0.0431(3) 0.0342(3) 0.0411(3) -0.0161(2) -0.0083(2) -0.0102(2) 
Cl3 0.0321(2) 0.0262(2) 0.0432(3) -0.00546(18) -0.0156(2) -0.00030(18) 
Cl4 0.0505(3) 0.0455(3) 0.0338(3) -0.0161(2) -0.0065(2) 0.0115(2) 
O1 0.0319(6) 0.0252(6) 0.0295(6) -0.0095(5) -0.0055(5) -0.0063(5) 
N1 0.0474(9) 0.0242(8) 0.0233(7) 0.0003(6) -0.0118(7) -0.0132(7) 
N2 0.0339(7) 0.0235(7) 0.0258(7) -0.0014(6) -0.0132(6) -0.0087(6) 
N3 0.0245(7) 0.0225(7) 0.0281(7) -0.0055(6) -0.0072(6) -0.0072(6) 
N4 0.0347(8) 0.0292(9) 0.0286(8) -0.0008(7) -0.0041(7) -0.0019(7) 
C1 0.0270(8) 0.0248(9) 0.0241(8) -0.0034(6) -0.0062(7) -0.0086(7) 
C2 0.0285(8) 0.0264(9) 0.0258(8) -0.0015(7) -0.0081(7) -0.0133(7) 
C3 0.0318(9) 0.0267(9) 0.0308(9) 0.0022(7) -0.0126(7) -0.0133(7) 
C4 0.0262(8) 0.0225(9) 0.0385(10) -0.0014(7) -0.0106(7) -0.0102(7) 
C5 0.0237(8) 0.0287(9) 0.0320(9) -0.0076(7) -0.0051(7) -0.0107(7) 
C6 0.0272(8) 0.0304(9) 0.0266(8) -0.0027(7) -0.0087(7) -0.0125(7) 
C7 0.0237(8) 0.0241(9) 0.0278(8) -0.0003(6) -0.0089(7) -0.0106(7) 
C8 0.0416(10) 0.0367(10) 0.0244(8) -0.0011(7) -0.0112(8) -0.0168(8) 
C9 0.0340(9) 0.0294(10) 0.0319(9) 0.0034(7) -0.0153(8) -0.0116(8) 
C10 0.0267(8) 0.0202(8) 0.0239(8) -0.0013(6) -0.0101(7) -0.0041(7) 
C11 0.0362(10) 0.0333(10) 0.0442(11) -0.0069(8) -0.0137(9) -0.0162(8) 
C12 0.0216(7) 0.0254(9) 0.0274(8) -0.0064(7) -0.0059(7) -0.0069(7) 
C13 0.0243(8) 0.0266(9) 0.0275(8) -0.0028(7) -0.0095(7) -0.0084(7) 
C14 0.0214(8) 0.0261(9) 0.0347(9) -0.0044(7) -0.0111(7) -0.0041(7) 
C15 0.0255(8) 0.0333(10) 0.0295(9) -0.0099(7) -0.0052(7) -0.0020(7) 
C16 0.0323(9) 0.0368(11) 0.0257(9) -0.0029(8) -0.0064(8) -0.0028(8) 
C17 0.0244(8) 0.0277(9) 0.0290(9) -0.0022(7) -0.0069(7) -0.0050(7) 
C18 0.0611(14) 0.0399(13) 0.0359(11) 0.0063(9) -0.0128(10) 0.0024(11) 
C1A 0.045(4) 0.077(5) 0.040(3) 0.007(3) -0.020(3) 0.001(4) 
C2A 0.065(4) 0.063(4) 0.049(3) -0.006(3) -0.030(3) 0.006(3) 
C3A 0.075(4) 0.065(4) 0.067(4) 0.010(3) -0.038(3) -0.022(4) 
C4A 0.045(3) 0.061(4) 0.052(3) 0.009(3) -0.011(2) -0.026(3) 
C5A 0.039(3) 0.057(3) 0.039(2) 0.004(2) -0.011(2) -0.011(2) 
C6A 0.042(3) 0.071(4) 0.054(3) 0.014(3) -0.022(3) -0.012(3) 
C1B 0.037(3) 0.051(4) 0.039(3) 0.001(3) -0.007(3) -0.011(3) 
C2B 0.054(4) 0.079(6) 0.058(4) 0.002(4) -0.012(4) -0.028(4) 
C3B 0.066(5) 0.079(6) 0.067(5) 0.010(4) -0.030(4) -0.025(5) 
C4B 0.040(3) 0.080(6) 0.040(4) 0.002(4) -0.023(3) -0.006(4) 
C5B 0.034(5) 0.079(7) 0.040(4) 0.003(4) -0.016(3) -0.013(5) 
C6B 0.056(5) 0.068(5) 0.042(4) 0.007(3) -0.029(4) -0.015(4) 
 
_geom_special_details 
; 
 All esds (except the esd in the dihedral angle between two l.s. planes) 
 are estimated using the full covariance matrix.  The cell esds are taken 
 into account individually in the estimation of esds in distances, angles 
 and torsion angles; correlations between esds in cell parameters are only 
 used when they are defined by crystal symmetry.  An approximate (isotropic) 
 treatment of cell esds is used for estimating esds involving l.s. planes. 
; 
 
loop_ 
 _geom_bond_atom_site_label_1 
 _geom_bond_atom_site_label_2 
 _geom_bond_distance 
 _geom_bond_site_symmetry_2 
 _geom_bond_publ_flag 
Cl1 C4 1.7342(18) . ? 
Cl2 C5 1.7397(17) . ? 
Cl3 C14 1.7356(18) . ? 
Cl4 C15 1.7340(17) . ? 
O1 C10 1.2320(19) . ? 
N1 C2 1.380(2) . ? 
N1 C8 1.448(2) . ? 
N1 C1 1.456(2) . ? 
N2 C7 1.378(2) . ? 
N2 C9 1.445(2) . ? 
N2 C1 1.450(2) . ? 
N3 C10 1.351(2) . ? 
N3 C12 1.440(2) . ? 
N3 C11 1.475(2) . ? 
N4 C17 1.364(2) . ? 
N4 C18 1.446(3) . ? 
N4 H4N 0.83(2) . ? 
C1 C10 1.546(2) . ? 
C1 H1 1.0000 . ? 
C2 C3 1.371(2) . ? 
C2 C7 1.412(2) . ? 
C3 C4 1.405(2) . ? 
C3 H3 0.9500 . ? 
C4 C5 1.380(3) . ? 
C5 C6 1.404(2) . ? 
C6 C7 1.375(2) . ? 
C6 H6 0.9500 . ? 
C8 H8A 0.9800 . ? 
C8 H8B 0.9800 . ? 
C8 H8C 0.9800 . ? 
C9 H9A 0.9800 . ? 
C9 H9B 0.9800 . ? 
C9 H9C 0.9800 . ? 
C11 H11A 0.9800 . ? 
C11 H11B 0.9800 . ? 
C11 H11C 0.9800 . ? 
C12 C13 1.380(2) . ? 
C12 C17 1.415(2) . ? 
C13 C14 1.395(2) . ? 
C13 H13 0.9500 . ? 
C14 C15 1.380(3) . ? 
C15 C16 1.389(3) . ? 
C16 C17 1.400(2) . ? 
C16 H16 0.9500 . ? 
C18 H18A 0.9800 . ? 
C18 H18B 0.9800 . ? 
C18 H18C 0.9800 . ? 
C1A C6A 1.3899 . ? 
C1A C2A 1.3900 . ? 
C1A H1A 0.9599 . ? 
C2A C3A 1.3900 . ? 
C2A H2A 0.9600 . ? 
C3A C4A 1.3899 . ? 
C3A H3A 0.9601 . ? 
C4A C5A 1.3901 . ? 
C4A H4A 0.9600 . ? 
C5A C6A 1.3900 . ? 
C5A H5A 0.9600 . ? 
C6A H6A 0.9601 . ? 
C1B C2B 1.3900 . ? 
C1B C6B 1.3901 . ? 
C1B H1B 0.9601 . ? 
C2B C3B 1.3900 . ? 
C2B H2B 0.9600 . ? 
C3B C4B 1.3900 . ? 
C3B H3B 0.9599 . ? 
C4B C5B 1.3901 . ? 
C4B H4B 0.9600 . ? 
C5B C6B 1.3899 . ? 
C5B H5B 0.9601 . ? 
C6B H6B 0.9600 . ? 
 
loop_ 
 _geom_angle_atom_site_label_1 
 _geom_angle_atom_site_label_2 
 _geom_angle_atom_site_label_3 
 _geom_angle 
 _geom_angle_site_symmetry_1 
 _geom_angle_site_symmetry_3 
 _geom_angle_publ_flag 
C2 N1 C8 124.44(15) . . ? 
C2 N1 C1 110.18(13) . . ? 
C8 N1 C1 121.50(14) . . ? 
C7 N2 C9 124.17(14) . . ? 
C7 N2 C1 110.38(13) . . ? 
C9 N2 C1 122.95(14) . . ? 
C10 N3 C12 126.52(14) . . ? 
C10 N3 C11 117.53(14) . . ? 
C12 N3 C11 115.93(13) . . ? 
C17 N4 C18 122.12(16) . . ? 
C17 N4 H4N 116.0(15) . . ? 
C18 N4 H4N 116.8(15) . . ? 
N2 C1 N1 102.78(13) . . ? 
N2 C1 C10 116.70(13) . . ? 
N1 C1 C10 108.21(13) . . ? 
N2 C1 H1 109.6 . . ? 
N1 C1 H1 109.6 . . ? 
C10 C1 H1 109.6 . . ? 
C3 C2 N1 130.51(16) . . ? 
C3 C2 C7 121.33(15) . . ? 
N1 C2 C7 108.07(15) . . ? 
C2 C3 C4 117.61(16) . . ? 
C2 C3 H3 121.2 . . ? 
C4 C3 H3 121.2 . . ? 
C5 C4 C3 121.20(16) . . ? 
C5 C4 Cl1 121.30(13) . . ? 
C3 C4 Cl1 117.48(13) . . ? 
C4 C5 C6 121.19(16) . . ? 
C4 C5 Cl2 120.86(14) . . ? 
C6 C5 Cl2 117.95(13) . . ? 
C7 C6 C5 117.61(15) . . ? 
C7 C6 H6 121.2 . . ? 
C5 C6 H6 121.2 . . ? 
C6 C7 N2 130.70(15) . . ? 
C6 C7 C2 121.05(15) . . ? 
N2 C7 C2 108.19(14) . . ? 
N1 C8 H8A 109.5 . . ? 
N1 C8 H8B 109.5 . . ? 
H8A C8 H8B 109.5 . . ? 
N1 C8 H8C 109.5 . . ? 
H8A C8 H8C 109.5 . . ? 
H8B C8 H8C 109.5 . . ? 
N2 C9 H9A 109.5 . . ? 
N2 C9 H9B 109.5 . . ? 
H9A C9 H9B 109.5 . . ? 
N2 C9 H9C 109.5 . . ? 
H9A C9 H9C 109.5 . . ? 
H9B C9 H9C 109.5 . . ? 
O1 C10 N3 121.56(15) . . ? 
O1 C10 C1 117.38(14) . . ? 
N3 C10 C1 120.83(14) . . ? 
N3 C11 H11A 109.5 . . ? 
N3 C11 H11B 109.5 . . ? 
H11A C11 H11B 109.5 . . ? 
N3 C11 H11C 109.5 . . ? 
H11A C11 H11C 109.5 . . ? 
H11B C11 H11C 109.5 . . ? 
C13 C12 C17 121.02(15) . . ? 
C13 C12 N3 120.76(15) . . ? 
C17 C12 N3 118.00(15) . . ? 
C12 C13 C14 120.66(15) . . ? 
C12 C13 H13 119.7 . . ? 
C14 C13 H13 119.7 . . ? 
C15 C14 C13 118.71(16) . . ? 
C15 C14 Cl3 121.59(13) . . ? 
C13 C14 Cl3 119.69(13) . . ? 
C14 C15 C16 121.44(16) . . ? 
C14 C15 Cl4 120.47(14) . . ? 
C16 C15 Cl4 118.09(14) . . ? 
C15 C16 C17 120.60(16) . . ? 
C15 C16 H16 119.7 . . ? 
C17 C16 H16 119.7 . . ? 
N4 C17 C16 122.09(16) . . ? 
N4 C17 C12 120.39(15) . . ? 
C16 C17 C12 117.51(16) . . ? 
N4 C18 H18A 109.5 . . ? 
N4 C18 H18B 109.5 . . ? 
H18A C18 H18B 109.5 . . ? 
N4 C18 H18C 109.5 . . ? 
H18A C18 H18C 109.5 . . ? 
H18B C18 H18C 109.5 . . ? 
C6A C1A C2A 120.0 . . ? 
C6A C1A H1A 117.7 . . ? 
C2A C1A H1A 122.3 . . ? 
C1A C2A C3A 120.0 . . ? 
C1A C2A H2A 120.0 . . ? 
C3A C2A H2A 120.0 . . ? 
C4A C3A C2A 120.0 . . ? 
C4A C3A H3A 120.0 . . ? 
C2A C3A H3A 120.0 . . ? 
C3A C4A C5A 120.0 . . ? 
C3A C4A H4A 120.0 . . ? 
C5A C4A H4A 120.0 . . ? 
C6A C5A C4A 120.0 . . ? 
C6A C5A H5A 120.0 . . ? 
C4A C5A H5A 120.0 . . ? 
C1A C6A C5A 120.0 . . ? 
C1A C6A H6A 120.0 . . ? 
C5A C6A H6A 120.0 . . ? 
C2B C1B C6B 120.0 . . ? 
C2B C1B H1B 121.8 . . ? 
C6B C1B H1B 118.2 . . ? 
C3B C2B C1B 120.0 . . ? 
C3B C2B H2B 120.0 . . ? 
C1B C2B H2B 120.0 . . ? 
C4B C3B C2B 120.0 . . ? 
C4B C3B H3B 120.0 . . ? 
C2B C3B H3B 120.0 . . ? 
C3B C4B C5B 120.0 . . ? 
C3B C4B H4B 120.0 . . ? 
C5B C4B H4B 120.0 . . ? 
C6B C5B C4B 120.0 . . ? 
C6B C5B H5B 120.0 . . ? 
C4B C5B H5B 120.0 . . ? 
C5B C6B C1B 120.0 . . ? 
C5B C6B H6B 120.0 . . ? 
C1B C6B H6B 120.0 . . ? 
loop_ 
 _geom_torsion_atom_site_label_1 
 _geom_torsion_atom_site_label_2 
 _geom_torsion_atom_site_label_3 
 _geom_torsion_atom_site_label_4 
 _geom_torsion 
 _geom_torsion_site_symmetry_1 
 _geom_torsion_site_symmetry_2 
 _geom_torsion_site_symmetry_3 
 _geom_torsion_site_symmetry_4 
 _geom_torsion_publ_flag 
C7 N2 C1 N1 6.32(17) . . . . ? 
C9 N2 C1 N1 169.03(15) . . . . ? 
C7 N2 C1 C10 124.53(15) . . . . ? 
C9 N2 C1 C10 -72.8(2) . . . . ? 
C2 N1 C1 N2 -5.84(17) . . . . ? 
C8 N1 C1 N2 -164.56(15) . . . . ? 
C2 N1 C1 C10 -129.87(14) . . . . ? 
C8 N1 C1 C10 71.41(19) . . . . ? 
C8 N1 C2 C3 -22.2(3) . . . . ? 
C1 N1 C2 C3 179.78(17) . . . . ? 
C8 N1 C2 C7 161.34(16) . . . . ? 
C1 N1 C2 C7 3.37(19) . . . . ? 
N1 C2 C3 C4 -176.44(17) . . . . ? 
C7 C2 C3 C4 -0.4(2) . . . . ? 
C2 C3 C4 C5 -0.7(2) . . . . ? 
C2 C3 C4 Cl1 177.60(12) . . . . ? 
C3 C4 C5 C6 0.9(3) . . . . ? 
Cl1 C4 C5 C6 -177.33(12) . . . . ? 
C3 C4 C5 Cl2 179.83(13) . . . . ? 
Cl1 C4 C5 Cl2 1.6(2) . . . . ? 
C4 C5 C6 C7 0.1(2) . . . . ? 
Cl2 C5 C6 C7 -178.94(12) . . . . ? 
C5 C6 C7 N2 175.63(16) . . . . ? 
C5 C6 C7 C2 -1.1(2) . . . . ? 
C9 N2 C7 C6 15.8(3) . . . . ? 
C1 N2 C7 C6 178.30(16) . . . . ? 
C9 N2 C7 C2 -167.06(15) . . . . ? 
C1 N2 C7 C2 -4.61(18) . . . . ? 
C3 C2 C7 C6 1.4(2) . . . . ? 
N1 C2 C7 C6 178.18(15) . . . . ? 
C3 C2 C7 N2 -176.06(15) . . . . ? 
N1 C2 C7 N2 0.75(19) . . . . ? 
C12 N3 C10 O1 -178.03(15) . . . . ? 
C11 N3 C10 O1 0.8(2) . . . . ? 
C12 N3 C10 C1 7.5(2) . . . . ? 
C11 N3 C10 C1 -173.66(14) . . . . ? 
N2 C1 C10 O1 147.85(15) . . . . ? 
N1 C1 C10 O1 -96.93(17) . . . . ? 
N2 C1 C10 N3 -37.5(2) . . . . ? 
N1 C1 C10 N3 77.76(18) . . . . ? 
C10 N3 C12 C13 -81.5(2) . . . . ? 
C11 N3 C12 C13 99.65(18) . . . . ? 
C10 N3 C12 C17 103.87(19) . . . . ? 
C11 N3 C12 C17 -74.98(19) . . . . ? 
C17 C12 C13 C14 -3.0(2) . . . . ? 
N3 C12 C13 C14 -177.50(15) . . . . ? 
C12 C13 C14 C15 1.4(2) . . . . ? 
C12 C13 C14 Cl3 -177.42(13) . . . . ? 
C13 C14 C15 C16 0.4(3) . . . . ? 
Cl3 C14 C15 C16 179.22(15) . . . . ? 
C13 C14 C15 Cl4 -178.89(13) . . . . ? 
Cl3 C14 C15 Cl4 -0.1(2) . . . . ? 
C14 C15 C16 C17 -0.6(3) . . . . ? 
Cl4 C15 C16 C17 178.72(15) . . . . ? 
C18 N4 C17 C16 7.4(3) . . . . ? 
C18 N4 C17 C12 -173.70(19) . . . . ? 
C15 C16 C17 N4 178.02(18) . . . . ? 
C15 C16 C17 C12 -1.0(3) . . . . ? 
C13 C12 C17 N4 -176.23(16) . . . . ? 
N3 C12 C17 N4 -1.6(2) . . . . ? 
C13 C12 C17 C16 2.8(3) . . . . ? 
N3 C12 C17 C16 177.38(15) . . . . ? 
C6A C1A C2A C3A 0.0 . . . . ? 
C1A C2A C3A C4A 0.0 . . . . ? 
C2A C3A C4A C5A 0.0 . . . . ? 
C3A C4A C5A C6A 0.0 . . . . ? 
C2A C1A C6A C5A 0.0 . . . . ? 
C4A C5A C6A C1A 0.0 . . . . ? 
C6B C1B C2B C3B 0.0 . . . . ? 
C1B C2B C3B C4B 0.0 . . . . ? 
C2B C3B C4B C5B 0.0 . . . . ? 
C3B C4B C5B C6B 0.0 . . . . ? 
C4B C5B C6B C1B 0.0 . . . . ? 
C2B C1B C6B C5B 0.0 . . . . ? 

 
loop_ 
 _geom_hbond_atom_site_label_D 
 _geom_hbond_atom_site_label_H 
 _geom_hbond_atom_site_label_A 
 _geom_hbond_distance_DH 
 _geom_hbond_distance_HA 
 _geom_hbond_distance_DA 
 _geom_hbond_angle_DHA 
 _geom_hbond_site_symmetry_A 
N4 H4N O1  0.83(2) 2.15(2) 2.938(2) 157(2) 2_666 
 
_diffrn_measured_fraction_theta_max    0.988 
_diffrn_reflns_theta_full              27.43 
_diffrn_measured_fraction_theta_full   0.988 
_refine_diff_density_max    0.276 
_refine_diff_density_min   -0.337 
_refine_diff_density_rms    0.049 

#===END 

 
data_new1
 
_audit_creation_method            SHELXL-97
_chemical_name_systematic
;
 ?
;
_chemical_name_common             ?
_chemical_melting_point           ?
_chemical_formula_moiety          ?
_chemical_formula_sum
 'C22 H28 N4 O4'
_chemical_formula_weight          412.48
 
loop_
 _atom_type_symbol
 _atom_type_description
 _atom_type_scat_dispersion_real
 _atom_type_scat_dispersion_imag
 _atom_type_scat_source
 'C'  'C'   0.0033   0.0016
 'International Tables Vol C Tables 4.2.6.8 and 6.1.1.4'
 'H'  'H'   0.0000   0.0000
 'International Tables Vol C Tables 4.2.6.8 and 6.1.1.4'
 'N'  'N'   0.0061   0.0033
 'International Tables Vol C Tables 4.2.6.8 and 6.1.1.4'
 'O'  'O'   0.0106   0.0060
 'International Tables Vol C Tables 4.2.6.8 and 6.1.1.4'
 
_symmetry_cell_setting            Monoclinic
_symmetry_space_group_name_H-M    C2/c
 
loop_
 _symmetry_equiv_pos_as_xyz
 'x, y, z'
 '-x, y, -z+1/2'
 'x+1/2, y+1/2, z'
 '-x+1/2, y+1/2, -z+1/2'
 '-x, -y, -z'
 'x, -y, z-1/2'
 '-x+1/2, -y+1/2, -z'
 'x+1/2, -y+1/2, z-1/2'
 
_cell_length_a                    11.545(2)
_cell_length_b                    11.531(2)
_cell_length_c                    32.792(9)
_cell_angle_alpha                 90.00
_cell_angle_beta                  99.890(3)
_cell_angle_gamma                 90.00
_cell_volume                      4300.6(16)
_cell_formula_units_Z             8
_cell_measurement_temperature     153(2)
_cell_measurement_reflns_used     2354
_cell_measurement_theta_min       3
_cell_measurement_theta_max       27.5
 
_exptl_crystal_description        plates
_exptl_crystal_colour             yellow
_exptl_crystal_size_max           0.26
_exptl_crystal_size_mid           0.20
_exptl_crystal_size_min           0.07
_exptl_crystal_density_meas       ?
_exptl_crystal_density_diffrn     1.274
_exptl_crystal_density_method     'not measured'
_exptl_crystal_F_000              1760
_exptl_absorpt_coefficient_mu     0.089
_exptl_absorpt_correction_type    none
_exptl_absorpt_correction_T_min   ?
_exptl_absorpt_correction_T_max   ?
_exptl_absorpt_process_details    ?
 
_exptl_special_details
;
 ?
;
 
_diffrn_ambient_temperature       153(2)
_diffrn_radiation_wavelength      0.71073
_diffrn_radiation_type            MoK\a
_diffrn_radiation_source          'fine-focus sealed tube'
_diffrn_radiation_monochromator   graphite
_diffrn_measurement_device_type   'Nonius Kappa CCD'
_diffrn_measurement_method        \w-scans
_diffrn_detector_area_resol_mean  ?
_diffrn_standards_number          ?
_diffrn_standards_interval_count  ?
_diffrn_standards_interval_time   ?
_diffrn_standards_decay_%         ?
_diffrn_reflns_number             4665
_diffrn_reflns_av_R_equivalents   0.0000
_diffrn_reflns_av_sigmaI/netI     0.0764
_diffrn_reflns_limit_h_min        -14
_diffrn_reflns_limit_h_max        14
_diffrn_reflns_limit_k_min        -14
_diffrn_reflns_limit_k_max        14
_diffrn_reflns_limit_l_min        -42
_diffrn_reflns_limit_l_max        42
_diffrn_reflns_theta_min          2.95
_diffrn_reflns_theta_max          27.66
_reflns_number_total              4665
_reflns_number_gt                 3012
_reflns_threshold_expression      >2sigma(I)
 
_publ_section_references
;
Altomare A., Burla M.C., Camalli M., Cascarano G.L., Giacovazzo C., 
Guagliardi A., Moliterni A.G.G., Polidori G.,Spagna R. Sir97.  
(1999) J. Appl. Cryst. 32, 115-119.

Farrugia, L. J.  (1999).  J. Applied Cryst. 32, 837-838.

Otwinowski, Z. and Minor, W.  (1997).  Methods in Enzymology,
276, Macromolecular Crystallography, part A, 307-326, C. W. Carter,
Jr. and R. M. Sweets, Eds., Academic Press.

Sheldrick, G. M.  (1998).  SHELXTL/PC.  Release 5.10.  Siemens 
Analytical X-ray Instruments, Inc., Madison, WI, USA.

Spek, A. L. (1998) PLATON, A Multipurpose Crystallographic Tool, Utrecht 
University, Utrecht, The Netherlands.


;
_computing_data_collection        'Collect software, Nonius B.V. 1998'
_computing_cell_refinement        'Collect software, Nonius B.V. 1998'
_computing_data_reduction         
;
DENZO and Scalepack (Otwinoski and Minor, 1997)
;
_computing_structure_solution     
;

SIR97 - Altomare A., Burla M.C., Camalli M., Cascarano G.L., Giacovazzo C., 
Guagliardi A., Moliterni A.G.G., Polidori G.,Spagna R.
;
_computing_structure_refinement   'XL SHELXTL/PC, Siemens Analytical'
_computing_molecular_graphics     'XP SHELXTL/PC, Siemens Analytical' 
_computing_publication_material   ? 


  
_refine_special_details
;
 Refinement of F^2^ against ALL reflections.  The weighted R-factor wR and
 goodness of fit S are based on F^2^, conventional R-factors R are based
 on F, with F set to zero for negative F^2^. The threshold expression of
 F^2^ > 2sigma(F^2^) is used only for calculating R-factors(gt) etc. and is
 not relevant to the choice of reflections for refinement.  R-factors based
 on F^2^ are statistically about twice as large as those based on F, and R-
 factors based on ALL data will be even larger.
The crystal was multiply twinned.  The 
twin laws were determined using TwinRotMat in Platon98 (Spek, 1998).  The 
twin laws were (0,1,0/1,0,0/-0.5,-0.5,-1) about the -2,-2,1 reciprocal lattice 
direction with a twin fraction of 0.264(4), (1,0,0/0,-1,0/-1,0,-1) about the 
-2,0,1 reciprocal lattice direction with a twin fraction of 0.199(4), and 
(0,-1,0/-1,0,0/-0.5,0.5,-1) about the -1,1,0 direct lattice 
direction with a twin fraction of 0.265(4). 
Platon98 was used as incorporated in WinGx (Farrugia, 1999). 
;
 
_refine_ls_structure_factor_coef  Fsqd
_refine_ls_matrix_type            full
_refine_ls_weighting_scheme       calc
_refine_ls_weighting_details
 'calc w=1/[\s^2^(Fo^2^)+(0.0200P)^2^] where P=(Fo^2^+2Fc^2^)/3'
_atom_sites_solution_primary      direct
_atom_sites_solution_secondary    difmap
_atom_sites_solution_hydrogens    geom
_refine_ls_hydrogen_treatment     constr
_refine_ls_extinction_method      none
_refine_ls_extinction_coef        ?
_refine_ls_number_reflns          4665
_refine_ls_number_parameters      274
_refine_ls_number_restraints      180
_refine_ls_R_factor_all           0.1669
_refine_ls_R_factor_gt            0.1149
_refine_ls_wR_factor_ref          0.2220
_refine_ls_wR_factor_gt           0.2108
_refine_ls_goodness_of_fit_ref    2.678
_refine_ls_restrained_S_all       2.645
_refine_ls_shift/su_max           0.004
_refine_ls_shift/su_mean          0.001
 
loop_
 _atom_site_label
 _atom_site_type_symbol
 _atom_site_fract_x
 _atom_site_fract_y
 _atom_site_fract_z
 _atom_site_U_iso_or_equiv
 _atom_site_adp_type
 _atom_site_occupancy
 _atom_site_symmetry_multiplicity
 _atom_site_calc_flag
 _atom_site_refinement_flags
 _atom_site_disorder_assembly
 _atom_site_disorder_group
O1 O 0.6053(6) 0.6058(5) 0.44996(18) 0.0495(16) Uani 1 1 d U . .
O2 O 0.5921(5) 0.3879(5) 0.45025(17) 0.0514(17) Uani 1 1 d U . .
N1 N 0.5311(6) 0.5939(5) 0.2963(2) 0.0399(18) Uani 1 1 d U . .
N2 N 0.5165(5) 0.3919(6) 0.2975(2) 0.0370(16) Uani 1 1 d U . .
C1 C 0.5100(8) 0.4919(8) 0.2707(3) 0.0347(19) Uani 1 1 d U . .
C2 C 0.5496(7) 0.5519(8) 0.3386(2) 0.0350(18) Uani 1 1 d U . .
C3 C 0.5703(7) 0.6143(8) 0.3750(2) 0.040(2) Uani 1 1 d U . .
H3 H 0.5756 0.6947 0.3746 0.048 Uiso 1 1 d R . .
C4 C 0.5850(8) 0.5557(8) 0.4118(2) 0.0367(18) Uani 1 1 d U . .
C5 C 0.5759(8) 0.4343(8) 0.4121(2) 0.044(2) Uani 1 1 d U . .
C6 C 0.5533(7) 0.3729(7) 0.3745(3) 0.045(2) Uani 1 1 d U . .
H6 H 0.5477 0.2924 0.3745 0.054 Uiso 1 1 d R . .
C7 C 0.5397(7) 0.4334(8) 0.3380(2) 0.043(2) Uani 1 1 d U . .
C8 C 0.6159(9) 0.6787(9) 0.2878(3) 0.053(2) Uani 1 1 d U . .
H8A H 0.6956 0.6488 0.2969 0.079 Uiso 1 1 d R . .
H8B H 0.6056 0.7505 0.3027 0.079 Uiso 1 1 d R . .
H8C H 0.6038 0.6944 0.2580 0.079 Uiso 1 1 d R . .
C9 C 0.4199(10) 0.2971(10) 0.2898(3) 0.058(3) Uani 1 1 d U . .
H9A H 0.4363 0.2372 0.3112 0.087 Uiso 1 1 d R . .
H9B H 0.4191 0.2621 0.2625 0.087 Uiso 1 1 d R . .
H9C H 0.3432 0.3324 0.2907 0.087 Uiso 1 1 d R . .
C10 C 0.6034(12) 0.7244(9) 0.4517(3) 0.064(4) Uani 1 1 d U . .
H10A H 0.6643 0.7564 0.4375 0.096 Uiso 1 1 d R . .
H10B H 0.6181 0.7491 0.4807 0.096 Uiso 1 1 d R . .
H10C H 0.5262 0.7526 0.4382 0.096 Uiso 1 1 d R . .
C11 C 0.5844(11) 0.2633(10) 0.4529(3) 0.061(4) Uani 1 1 d U . .
H11A H 0.5034 0.2386 0.4426 0.092 Uiso 1 1 d R . .
H11B H 0.6075 0.2389 0.4818 0.092 Uiso 1 1 d R . .
H11C H 0.6372 0.2279 0.4360 0.092 Uiso 1 1 d R . .
O1A O 0.7087(4) 1.0048(5) 0.44916(12) 0.0404(12) Uani 1 1 d U . .
O2A O 0.4900(4) 0.9859(5) 0.45105(15) 0.0452(14) Uani 1 1 d U . .
N1A N 0.6248(5) 0.9990(6) 0.29623(17) 0.0356(14) Uani 1 1 d U . .
N2A N 0.4227(5) 0.9874(7) 0.29672(18) 0.0384(15) Uani 1 1 d U . .
C1A C 0.5100(8) 0.9889(7) 0.2706(2) 0.0265(17) Uani 1 1 d U . .
C2A C 0.6007(6) 0.9951(7) 0.33767(19) 0.0284(15) Uani 1 1 d U . .
C3A C 0.6842(6) 1.0003(8) 0.3745(2) 0.0399(18) Uani 1 1 d U . .
H3A H 0.7645 1.0047 0.3743 0.048 Uiso 1 1 d R . .
C4A C 0.6381(7) 0.9965(7) 0.4114(2) 0.0332(15) Uani 1 1 d U . .
C5A C 0.5158(7) 0.9856(6) 0.4116(2) 0.0371(18) Uani 1 1 d U . .
C6A C 0.4434(6) 0.9809(7) 0.3742(2) 0.0361(19) Uani 1 1 d U . .
H6A H 0.3630 0.9738 0.3739 0.043 Uiso 1 1 d R . .
C7A C 0.4800(6) 0.9870(6) 0.3371(2) 0.0352(18) Uani 1 1 d U . .
C8A C 0.7045(7) 1.0893(8) 0.2879(3) 0.045(2) Uani 1 1 d U . .
H8A1 H 0.7014 1.0964 0.2580 0.067 Uiso 1 1 d R . .
H8A2 H 0.7847 1.0696 0.3012 0.067 Uiso 1 1 d R . .
H8A3 H 0.6814 1.1632 0.2990 0.067 Uiso 1 1 d R . .
C9A C 0.3352(9) 0.8901(8) 0.2880(3) 0.050(3) Uani 1 1 d U . .
H9A1 H 0.3727 0.8171 0.2983 0.074 Uiso 1 1 d R . .
H9A2 H 0.3078 0.8841 0.2581 0.074 Uiso 1 1 d R . .
H9A3 H 0.2681 0.9055 0.3019 0.074 Uiso 1 1 d R . .
C10A C 0.8335(7) 1.0157(12) 0.4513(2) 0.062(3) Uani 1 1 d U . .
H10D H 0.8638 0.9473 0.4388 0.093 Uiso 1 1 d R . .
H10E H 0.8718 1.0224 0.4803 0.093 Uiso 1 1 d R . .
H10F H 0.8500 1.0853 0.4361 0.093 Uiso 1 1 d R . .
C11A C 0.3619(8) 0.9848(11) 0.4520(2) 0.057(3) Uani 1 1 d U . .
H11D H 0.3256 1.0552 0.4388 0.086 Uiso 1 1 d R . .
H11E H 0.3494 0.9819 0.4808 0.086 Uiso 1 1 d R . .
H11F H 0.3263 0.9165 0.4371 0.086 Uiso 1 1 d R . .
 
loop_
 _atom_site_aniso_label
 _atom_site_aniso_U_11
 _atom_site_aniso_U_22
 _atom_site_aniso_U_33
 _atom_site_aniso_U_23
 _atom_site_aniso_U_13
 _atom_site_aniso_U_12
O1 0.052(4) 0.043(4) 0.053(4) -0.003(3) 0.007(3) -0.004(3)
O2 0.058(4) 0.040(3) 0.056(4) 0.004(3) 0.008(3) 0.006(3)
N1 0.037(4) 0.022(4) 0.059(4) 0.005(3) 0.002(4) -0.012(3)
N2 0.023(4) 0.034(4) 0.052(4) 0.000(3) -0.001(3) 0.003(3)
C1 0.041(4) 0.018(3) 0.046(4) 0.004(4) 0.010(4) 0.002(3)
C2 0.025(5) 0.035(5) 0.045(5) 0.002(4) 0.006(4) 0.002(3)
C3 0.038(5) 0.043(4) 0.041(5) -0.007(4) 0.011(4) -0.014(4)
C4 0.025(5) 0.050(5) 0.034(4) -0.002(4) 0.004(4) -0.005(3)
C5 0.063(6) 0.042(5) 0.026(4) 0.000(4) 0.002(4) 0.005(4)
C6 0.040(5) 0.027(4) 0.068(6) 0.009(4) 0.009(4) 0.009(4)
C7 0.032(5) 0.064(6) 0.034(4) -0.004(4) 0.008(4) 0.018(4)
C8 0.058(6) 0.025(5) 0.072(6) -0.006(5) 0.003(5) -0.001(4)
C9 0.058(7) 0.069(8) 0.046(5) -0.024(5) 0.007(5) -0.022(5)
C10 0.089(9) 0.055(7) 0.049(7) -0.008(5) 0.013(7) -0.015(7)
C11 0.079(9) 0.053(6) 0.056(7) 0.003(6) 0.023(7) 0.013(6)
O1A 0.044(3) 0.045(3) 0.030(2) 0.002(3) 0.000(2) 0.007(3)
O2A 0.022(3) 0.057(4) 0.059(3) 0.006(3) 0.012(2) 0.002(3)
N1A 0.042(4) 0.026(3) 0.036(3) -0.001(4) -0.001(3) -0.015(3)
N2A 0.026(4) 0.049(5) 0.038(3) 0.004(4) 0.002(3) -0.008(3)
C1A 0.039(4) 0.005(2) 0.036(4) 0.002(3) 0.009(4) 0.001(3)
C2A 0.029(4) 0.022(4) 0.036(3) -0.004(4) 0.009(3) 0.000(3)
C3A 0.024(4) 0.029(4) 0.068(5) 0.012(5) 0.013(4) 0.010(4)
C4A 0.034(4) 0.027(4) 0.036(3) 0.003(4) -0.001(3) 0.003(4)
C5A 0.039(5) 0.024(5) 0.050(4) 0.009(4) 0.014(4) 0.006(3)
C6A 0.032(4) 0.038(5) 0.038(4) 0.002(4) 0.003(3) -0.002(3)
C7A 0.021(4) 0.024(4) 0.063(5) 0.000(4) 0.016(4) 0.007(3)
C8A 0.005(4) 0.064(6) 0.063(6) 0.005(5) 0.000(4) -0.003(3)
C9A 0.050(6) 0.016(4) 0.087(7) -0.009(5) 0.021(5) -0.010(4)
C10A 0.021(5) 0.116(9) 0.050(5) -0.002(6) 0.010(4) 0.030(6)
C11A 0.031(5) 0.092(8) 0.054(5) 0.004(6) 0.019(5) 0.000(6)
 
_geom_special_details
;
 All esds (except the esd in the dihedral angle between two l.s. planes)
 are estimated using the full covariance matrix.  The cell esds are taken
 into account individually in the estimation of esds in distances, angles
 and torsion angles; correlations between esds in cell parameters are only
 used when they are defined by crystal symmetry.  An approximate (isotropic)
 treatment of cell esds is used for estimating esds involving l.s. planes.
;
 
loop_
 _geom_bond_atom_site_label_1
 _geom_bond_atom_site_label_2
 _geom_bond_distance
 _geom_bond_site_symmetry_2
 _geom_bond_publ_flag
O1 C4 1.361(9) . ?
O1 C10 1.369(11) . ?
O2 C5 1.343(9) . ?
O2 C11 1.442(13) . ?
N1 C1 1.441(11) . ?
N1 C8 1.443(11) . ?
N1 C2 1.450(11) . ?
N2 C7 1.393(10) . ?
N2 C1 1.444(11) . ?
N2 C9 1.550(12) . ?
C1 C1 1.338(16) 2_655 ?
C2 C7 1.371(11) . ?
C2 C3 1.379(10) . ?
C3 C4 1.368(11) . ?
C3 H3 0.9300 . ?
C4 C5 1.404(11) . ?
C5 C6 1.408(11) . ?
C6 C7 1.373(10) . ?
C6 H6 0.9300 . ?
C8 H8A 0.9800 . ?
C8 H8B 0.9800 . ?
C8 H8C 0.9800 . ?
C9 H9A 0.9800 . ?
C9 H9B 0.9800 . ?
C9 H9C 0.9800 . ?
C10 H10A 0.9800 . ?
C10 H10B 0.9800 . ?
C10 H10C 0.9800 . ?
C11 H11A 0.9800 . ?
C11 H11B 0.9800 . ?
C11 H11C 0.9800 . ?
O1A C4A 1.364(8) . ?
O1A C10A 1.436(10) . ?
O2A C5A 1.377(9) . ?
O2A C11A 1.484(10) . ?
N1A C2A 1.434(8) . ?
N1A C8A 1.446(10) . ?
N1A C1A 1.447(10) . ?
N2A C7A 1.376(10) . ?
N2A C1A 1.431(10) . ?
N2A C9A 1.504(11) . ?
C1A C1A 1.330(15) 2_655 ?
C2A C7A 1.394(9) . ?
C2A C3A 1.411(9) . ?
C3A C4A 1.404(10) . ?
C3A H3A 0.9300 . ?
C4A C5A 1.419(10) . ?
C5A C6A 1.361(10) . ?
C6A C7A 1.356(9) . ?
C6A H6A 0.9300 . ?
C8A H8A1 0.9800 . ?
C8A H8A2 0.9800 . ?
C8A H8A3 0.9800 . ?
C9A H9A1 0.9800 . ?
C9A H9A2 0.9800 . ?
C9A H9A3 0.9800 . ?
C10A H10D 0.9800 . ?
C10A H10E 0.9800 . ?
C10A H10F 0.9800 . ?
C11A H11D 0.9800 . ?
C11A H11E 0.9800 . ?
C11A H11F 0.9800 . ?
 
loop_
 _geom_angle_atom_site_label_1
 _geom_angle_atom_site_label_2
 _geom_angle_atom_site_label_3
 _geom_angle
 _geom_angle_site_symmetry_1
 _geom_angle_site_symmetry_3
 _geom_angle_publ_flag
C4 O1 C10 117.4(7) . . ?
C5 O2 C11 117.0(6) . . ?
C1 N1 C8 119.5(8) . . ?
C1 N1 C2 105.5(6) . . ?
C8 N1 C2 114.7(8) . . ?
C7 N2 C1 106.6(7) . . ?
C7 N2 C9 114.4(7) . . ?
C1 N2 C9 120.2(7) . . ?
C1 C1 N1 125.0(4) 2_655 . ?
C1 C1 N2 126.8(5) 2_655 . ?
N1 C1 N2 108.2(6) . . ?
C7 C2 C3 122.4(8) . . ?
C7 C2 N1 108.7(8) . . ?
C3 C2 N1 128.9(8) . . ?
C4 C3 C2 118.9(8) . . ?
C4 C3 H3 120.4 . . ?
C2 C3 H3 120.7 . . ?
O1 C4 C3 125.2(8) . . ?
O1 C4 C5 114.7(8) . . ?
C3 C4 C5 120.1(8) . . ?
O2 C5 C4 114.0(8) . . ?
O2 C5 C6 126.1(8) . . ?
C4 C5 C6 119.9(8) . . ?
C7 C6 C5 119.1(8) . . ?
C7 C6 H6 120.6 . . ?
C5 C6 H6 120.3 . . ?
C2 C7 C6 119.8(8) . . ?
C2 C7 N2 111.1(8) . . ?
C6 C7 N2 129.2(8) . . ?
N1 C8 H8A 109.6 . . ?
N1 C8 H8B 109.3 . . ?
H8A C8 H8B 109.5 . . ?
N1 C8 H8C 109.5 . . ?
H8A C8 H8C 109.5 . . ?
H8B C8 H8C 109.5 . . ?
N2 C9 H9A 109.6 . . ?
N2 C9 H9B 109.5 . . ?
H9A C9 H9B 109.5 . . ?
N2 C9 H9C 109.3 . . ?
H9A C9 H9C 109.5 . . ?
H9B C9 H9C 109.5 . . ?
O1 C10 H10A 109.8 . . ?
O1 C10 H10B 109.2 . . ?
H10A C10 H10B 109.5 . . ?
O1 C10 H10C 109.4 . . ?
H10A C10 H10C 109.5 . . ?
H10B C10 H10C 109.5 . . ?
O2 C11 H11A 109.5 . . ?
O2 C11 H11B 109.6 . . ?
H11A C11 H11B 109.5 . . ?
O2 C11 H11C 109.3 . . ?
H11A C11 H11C 109.5 . . ?
H11B C11 H11C 109.5 . . ?
C4A O1A C10A 119.2(6) . . ?
C5A O2A C11A 113.4(6) . . ?
C2A N1A C8A 115.7(6) . . ?
C2A N1A C1A 103.9(5) . . ?
C8A N1A C1A 119.8(6) . . ?
C7A N2A C1A 107.8(6) . . ?
C7A N2A C9A 112.1(7) . . ?
C1A N2A C9A 114.5(6) . . ?
C1A C1A N2A 126.2(10) 2_655 . ?
C1A C1A N1A 124.9(9) 2_655 . ?
N2A C1A N1A 108.8(6) . . ?
C7A C2A C3A 123.3(7) . . ?
C7A C2A N1A 110.3(7) . . ?
C3A C2A N1A 126.5(6) . . ?
C4A C3A C2A 115.6(6) . . ?
C4A C3A H3A 122.3 . . ?
C2A C3A H3A 122.2 . . ?
O1A C4A C3A 121.7(6) . . ?
O1A C4A C5A 116.2(7) . . ?
C3A C4A C5A 122.1(7) . . ?
C6A C5A O2A 130.3(7) . . ?
C6A C5A C4A 117.2(7) . . ?
O2A C5A C4A 112.4(7) . . ?
C7A C6A C5A 124.5(7) . . ?
C7A C6A H6A 117.4 . . ?
C5A C6A H6A 118.1 . . ?
C6A C7A N2A 133.7(7) . . ?
C6A C7A C2A 117.2(8) . . ?
N2A C7A C2A 109.0(6) . . ?
N1A C8A H8A1 109.5 . . ?
N1A C8A H8A2 109.4 . . ?
H8A1 C8A H8A2 109.5 . . ?
N1A C8A H8A3 109.5 . . ?
H8A1 C8A H8A3 109.5 . . ?
H8A2 C8A H8A3 109.5 . . ?
N2A C9A H9A1 109.4 . . ?
N2A C9A H9A2 109.4 . . ?
H9A1 C9A H9A2 109.5 . . ?
N2A C9A H9A3 109.6 . . ?
H9A1 C9A H9A3 109.5 . . ?
H9A2 C9A H9A3 109.5 . . ?
O1A C10A H10D 109.7 . . ?
O1A C10A H10E 109.6 . . ?
H10D C10A H10E 109.5 . . ?
O1A C10A H10F 109.2 . . ?
H10D C10A H10F 109.5 . . ?
H10E C10A H10F 109.5 . . ?
O2A C11A H11D 109.6 . . ?
O2A C11A H11E 109.5 . . ?
H11D C11A H11E 109.5 . . ?
O2A C11A H11F 109.3 . . ?
H11D C11A H11F 109.5 . . ?
H11E C11A H11F 109.5 . . ?
 
loop_
 _geom_torsion_atom_site_label_1
 _geom_torsion_atom_site_label_2
 _geom_torsion_atom_site_label_3
 _geom_torsion_atom_site_label_4
 _geom_torsion
 _geom_torsion_site_symmetry_1
 _geom_torsion_site_symmetry_2
 _geom_torsion_site_symmetry_3
 _geom_torsion_site_symmetry_4
 _geom_torsion_publ_flag
C8 N1 C1 C1 -48.3(16) . . . 2_655 ?
C2 N1 C1 C1 -179.2(11) . . . 2_655 ?
C8 N1 C1 N2 130.7(8) . . . . ?
C2 N1 C1 N2 -0.2(9) . . . . ?
C7 N2 C1 C1 179.5(11) . . . 2_655 ?
C9 N2 C1 C1 -48.2(15) . . . 2_655 ?
C7 N2 C1 N1 0.6(9) . . . . ?
C9 N2 C1 N1 132.9(8) . . . . ?
C1 N1 C2 C7 -0.2(9) . . . . ?
C8 N1 C2 C7 -133.8(8) . . . . ?
C1 N1 C2 C3 -178.2(8) . . . . ?
C8 N1 C2 C3 48.2(12) . . . . ?
C7 C2 C3 C4 2.0(13) . . . . ?
N1 C2 C3 C4 179.8(8) . . . . ?
C10 O1 C4 C3 4.5(13) . . . . ?
C10 O1 C4 C5 -173.6(9) . . . . ?
C2 C3 C4 O1 -179.7(8) . . . . ?
C2 C3 C4 C5 -1.6(13) . . . . ?
C11 O2 C5 C4 -179.8(8) . . . . ?
C11 O2 C5 C6 -0.7(13) . . . . ?
O1 C4 C5 O2 -1.8(11) . . . . ?
C3 C4 C5 O2 180.0(7) . . . . ?
O1 C4 C5 C6 179.1(7) . . . . ?
C3 C4 C5 C6 0.9(13) . . . . ?
O2 C5 C6 C7 -179.4(8) . . . . ?
C4 C5 C6 C7 -0.4(13) . . . . ?
C3 C2 C7 C6 -1.6(13) . . . . ?
N1 C2 C7 C6 -179.7(7) . . . . ?
C3 C2 C7 N2 178.8(7) . . . . ?
N1 C2 C7 N2 0.6(9) . . . . ?
C5 C6 C7 C2 0.7(12) . . . . ?
C5 C6 C7 N2 -179.6(8) . . . . ?
C1 N2 C7 C2 -0.7(9) . . . . ?
C9 N2 C7 C2 -136.1(8) . . . . ?
C1 N2 C7 C6 179.6(8) . . . . ?
C9 N2 C7 C6 44.2(12) . . . . ?
C7A N2A C1A C1A 179.5(4) . . . 2_655 ?
C9A N2A C1A C1A 54.0(8) . . . 2_655 ?
C7A N2A C1A N1A -4.6(9) . . . . ?
C9A N2A C1A N1A -130.1(7) . . . . ?
C2A N1A C1A C1A 179.8(4) . . . 2_655 ?
C8A N1A C1A C1A 48.7(8) . . . 2_655 ?
C2A N1A C1A N2A 3.8(8) . . . . ?
C8A N1A C1A N2A -127.3(7) . . . . ?
C8A N1A C2A C7A 131.8(7) . . . . ?
C1A N1A C2A C7A -1.7(8) . . . . ?
C8A N1A C2A C3A -47.4(11) . . . . ?
C1A N1A C2A C3A 179.1(8) . . . . ?
C7A C2A C3A C4A 0.1(12) . . . . ?
N1A C2A C3A C4A 179.1(7) . . . . ?
C10A O1A C4A C3A -1.0(12) . . . . ?
C10A O1A C4A C5A 179.8(8) . . . . ?
C2A C3A C4A O1A -177.7(8) . . . . ?
C2A C3A C4A C5A 1.4(12) . . . . ?
C11A O2A C5A C6A -2.3(12) . . . . ?
C11A O2A C5A C4A 175.0(8) . . . . ?
O1A C4A C5A C6A 178.0(7) . . . . ?
C3A C4A C5A C6A -1.2(11) . . . . ?
O1A C4A C5A O2A 0.3(9) . . . . ?
C3A C4A C5A O2A -178.9(7) . . . . ?
O2A C5A C6A C7A 176.5(7) . . . . ?
C4A C5A C6A C7A -0.7(12) . . . . ?
C5A C6A C7A N2A -177.7(8) . . . . ?
C5A C6A C7A C2A 2.0(12) . . . . ?
C1A N2A C7A C6A -176.7(8) . . . . ?
C9A N2A C7A C6A -49.8(12) . . . . ?
C1A N2A C7A C2A 3.5(8) . . . . ?
C9A N2A C7A C2A 130.4(7) . . . . ?
C3A C2A C7A C6A -1.7(11) . . . . ?
N1A C2A C7A C6A 179.1(7) . . . . ?
C3A C2A C7A N2A 178.1(8) . . . . ?
N1A C2A C7A N2A -1.1(8) . . . . ?
 
_diffrn_measured_fraction_theta_max    0.927
_diffrn_reflns_theta_full              27.66
_diffrn_measured_fraction_theta_full   0.927
_refine_diff_density_max    0.516
_refine_diff_density_min   -0.515
_refine_diff_density_rms    0.115
